1 Identification of different putative outer membrane electron conduits necessary for  
2 Fe(III) citrate, Fe(III) oxide, Mn(IV) oxide, or electrode reduction by *Geobacter*  
3 *sulfurreducens*

4

5

6 Fernanda Jiménez Otero<sup>a,b</sup>, Chi Ho Chan<sup>a</sup>, Daniel R. Bond<sup>a,b,c</sup>

7

8 BioTechnology Institute<sup>a</sup>, Department of Biochemistry, Molecular Biology, and  
9 Biophysics<sup>b</sup>, Department of Plant and Microbial Biology<sup>c</sup> University of Minnesota-Twin  
10 Cities, Saint Paul MN 55108

11

12 **Running title: Novel putative electron conduits of *G. sulfurreducens***

13

14 **Send all correspondence to:**

15 Daniel R. Bond

16 140 Gortner Laboratory

17 1479 Gortner Ave

18 St. Paul, MN 55108

19 dbond@umn.edu

20

21 **Keywords:** *Geobacter*, extracellular electron transfer, multiheme cytochrome, c-type  
22 cytochrome conduit

23 **ABSTRACT**

24 At least five gene clusters in the *Geobacter sulfurreducens* genome encode putative  
25 'electron conduits' implicated in electron transfer across the outer membrane, each  
26 containing a periplasmic multiheme c-type cytochrome, integral outer membrane  
27 anchor, and outer membrane redox lipoprotein(s). Markerless single gene cluster  
28 deletions and all possible multiple deletion combinations were constructed and grown  
29 with soluble Fe(III) citrate, Fe(III)- and Mn(IV)-oxides, and graphite electrodes poised at  
30 +0.24 V and -0.1 V vs. SHE. Different gene clusters were necessary for reduction of  
31 each electron acceptor. During metal oxide reduction, deletion of the previously  
32 described *omcBC* cluster caused defects, but deletion of additional components in an  
33  $\Delta omcBC$  background, such as *extEFG*, were needed to produce defects greater than  
34 50% compared to wild type. Deletion of all five gene clusters abolished all metal  
35 reduction. During electrode reduction, only the  $\Delta extABCD$  mutant had a severe growth  
36 defect at both redox potentials, while this mutation did not affect Fe(III)-oxide, Mn(IV)-  
37 oxide, or Fe(III) citrate reduction. Some mutants containing only one cluster were able  
38 to reduce particular terminal electron acceptors better than wild type, suggesting routes  
39 for improvement by targeting specific electron transfer pathways. Transcriptomic  
40 comparisons between fumarate and electrode-based growth showed all of these *ext*  
41 clusters to be constitutive, and transcriptional analysis of the triple-deletion strain  
42 containing only *extABCD* detected no significant changes in expression of known redox  
43 proteins or pili components. These genetic experiments reveal new outer membrane  
44 conduit complexes necessary for growth of *G. sulfurreducens*, depending on the  
45 available extracellular electron acceptor.

46

47 **IMPORTANCE**

48 Gram-negative metal-reducing bacteria utilize electron conduits, chains of redox  
49 proteins spanning the outer membrane, to transfer electrons to the extracellular surface.  
50 Only one pathway for electron transfer across the outer membrane of *Geobacter*  
51 *sulfurreducens* has been linked to Fe(III) reduction. However, *G. sulfurreducens* is able  
52 to respire a wide array of extracellular substrates. Here, we present the first  
53 combinatorial genetic analysis of five different electron conduits via creation of new  
54 markerless deletion strains and complementation vectors. Multiple conduit gene clusters  
55 appear to have overlapping roles, including two that have never been linked to metal  
56 reduction. Another recently described cluster (ExtABCD) was the only electron conduit  
57 essential during electrode reduction, a substrate of special importance to  
58 biotechnological applications of this organism.

59

## 60 INTRODUCTION

61 Microorganisms capable of extracellular respiration can alter the redox state of  
62 particulate metal oxides in soils and sediments, controlling their solubility and  
63 bioavailability (1–6). To respire with extracellular metals, bacteria must first transfer  
64 electrons from the cell interior to outer surface redox proteins, requiring unique  
65 transmembrane pathways compared to growth with intracellularly-reduced compounds.  
66 The use of surface-exposed electron transfer proteins and conductive appendages by  
67 these organisms presents opportunities for transformation of heavy metals, biological  
68 nanoparticle synthesis, and a new generation of microbially-powered electrochemical  
69 devices using bacteria grown on electrodes (7–13).

70

71 An extracellular electron transfer strategy must overcome several challenges. In Gram-  
72 negative cells, a conductive pathway capable of crossing the inner membrane,  
73 periplasm, and outer membrane must first be constructed (14, 15). Such pathways are  
74 capable of delivering electrons to soluble metals or redox-active molecules, but  
75 insoluble metal oxides present additional barriers. Fe(III)- and Mn(IV)-oxides vary widely  
76 in chemistry, surface charge, redox state, and surface area, thus an additional suite of  
77 proteins or appendages such as pili may be needed to link cell surfaces with different  
78 terminal minerals (16–18).

79

80 Many metal-reducing bacteria can also transfer electrons to electrodes (8, 19–21).  
81 Unlike metal oxide particles, electrodes represent an unlimited electron acceptor  
82 allowing cells in contact with the inorganic surface to support growth of more distant

83 cells, if they can create a conductive network of proteins that relay electrons to cells at  
84 the electrode. The physiological and chemical differences between soluble metals,  
85 metal particles, and electrodes raises the possibility that different electron transfer  
86 proteins may be needed to access each kind of extracellular mineral, surface, or  
87 molecule.

88

89 A model organism widely studied for its ability to reduce a diversity of metals and  
90 electrodes is the  $\delta$ -Proteobacterium *Geobacter sulfurreducens*, and recent work  
91 supports a model where different electron transfer proteins are used depending on  
92 substrate conditions. At the inner membrane where electrons first leave the quinone  
93 pool, a combination *c*- and *b*-type cytochrome CbcL (22) is only required when  
94 extracellular metals and electrodes are below redox potentials of -0.1 V vs. SHE, while  
95 the inner membrane *c*-type cytochrome ImcH (23), becomes essential if acceptors are  
96 at higher redox potentials (18). In another example, in the extracellular matrix beyond  
97 the cell surface, chemistry rather than redox potential appears to delineate which  
98 proteins are essential for electron transfer. The secreted cytochrome OmcZ and pili-  
99 based appendages are primarily linked to electrode growth, while the secreted  
100 cytochrome PgcA enhances reduction of Fe(III)-oxides without affecting electrode  
101 growth (24–31). Between the initial CbcL/ImcH-dependent event of inner membrane  
102 proton motive force generation and extracellular pili/OmcZ/PgcA interactions lies the  
103 outer membrane, a less understood barrier that was recently found to contain electron  
104 transfer proteins of surprising complexity (32–34).

105

106 The only known mechanism for non-diffusive electron transfer across the outer  
107 membrane is through a transmembrane ‘electron conduit’, consisting of an integral outer  
108 membrane protein anchoring a periplasmic multiheme cytochrome to an outer surface  
109 lipoprotein cytochrome. By linking redox active cofactors within a membrane-spanning  
110 complex, electron flow is permitted (32, 35). The first electron conduit described was the  
111 ~210 kDa MtrCAB complex from *S. oneidensis*, which will catalyze electron transfer  
112 across membranes when purified and placed in lipid vesicles (36–38). The *mtrCAB*  
113 gene cluster is essential for reduction of all tested soluble metals, electron shuttles,  
114 metal oxides, and electrodes by *S. oneidensis* (37, 39, 40). Related complexes capped  
115 with an extracellular DMSO reductase allow *Shewanella* to reduce DMSO on the cell  
116 exterior, while similar outer membrane conduits support inward electron flow by Fe(II)-  
117 oxidizing *Rhodopseudomonas* TIE-1 cells (41, 42).

118

119 In *G. sulfurreducens*, a gene cluster encoding the periplasmic cytochrome OmbB, the  
120 outer membrane integral protein OmaB, and lipoprotein cytochrome OmcB forms a  
121 conduit complex functionally similar to MtrCAB, though the two complexes lack any  
122 sequence similarity (34). This ‘*ombB-omaB-omcB*’ gene cluster is duplicated  
123 immediately downstream in the *G. sulfurreducens* genome as the near-identical ‘*ombC-*  
124 *omaC-omcC*’, together forming the ‘*omcBC*’ cluster. Antibiotic cassette insertions  
125 replacing *omcB*, as well as insertions replacing the entire ‘*ombB-omaB-omcB*’ conduit,  
126 decrease growth with Fe(III) as an electron acceptor, but the impact differs between  
127 reports and growth conditions (43–45). This variability and residual electron transfer

128 activity suggested the presence of alternative pathways able to catalyze electron  
129 transfer across the outer membrane (33).  
130  
131 New evidence for undiscovered outer membrane complexes was recently detected in  
132 genome-wide transposon data, where insertions in *omcB* or *omcC* had no effect on *G.*  
133 *sulfurreducens* growth with electrodes poised at -0.1 vs. SHE, a low potential chosen to  
134 mimic the redox potential of Fe(III)-oxides (46). Transposon insertions within an  
135 unstudied four-gene cluster containing c-type cytochrome conduit signatures caused  
136 significant defects during growth on the same -0.1 V electrodes (46). Deletion of this  
137 new cluster, named *extABCD*, severely affected growth on low-potential electrodes,  
138 while  $\Delta$ *extABCD* mutants still grew similar to wild type with Fe(III)-oxides. In contrast,  
139 deletion of the entire *omcBC* cluster had little impact on low-potential electrode growth  
140 (46). These data suggested that the outer membrane proteins essential for electron  
141 transfer across the membrane might vary depending on environmental conditions.  
142 However, these data involved only single deletions without complementation and did not  
143 test if different gene clusters were necessary across the full range of environmentally  
144 relevant conditions such as higher redox potentials, during growth with mineral forms  
145 such as Mn(VI), or when metals become soluble.  
146  
147 Using new markerless deletion methods, this study constructed mutants containing all  
148 combinations of the four putative conduit clusters on the genome of *G. sulfurreducens*.  
149 Each of these 15 mutants plus three strains containing expression vectors were then  
150 directly compared with five electron acceptors; Fe(III)- and Mn(IV)-oxides, poised

151 electrodes at two different redox potentials, and soluble Fe(III)-citrate. We found that  
152 during metal reduction the largest defects were in  $\Delta omcBC$  strains, but deletion of the  
153 newly identified cluster *extEFG* in the  $\Delta omcBC$  background was necessary to most  
154 severely inhibit Fe(III)-reduction, and deletion of all clusters was required to eliminate  
155 reduction of both soluble and insoluble metals. Strains containing only a single cluster  
156 showed preferences for reduction of different metals, such as the *extEFG*- and  
157 *extHIJKL*-only strains performing better with Mn(IV)-oxides than Fe(III)-oxides. When  
158 electrodes were the electron acceptor, only strains lacking *extABCD* showed a growth  
159 defect, and this effect was similar at all redox potentials. A strain still containing  
160 *extABCD* but lacking all other conduit clusters grew faster and to a higher final density  
161 on electrodes, and a complemented strain lacking all other conduit clusters expressing  
162 *extABCD* from a vector also grew faster than wild type. These data provide evidence  
163 that different *G. sulfurreducens* conduit clusters are necessary during extracellular  
164 electron transfer depending on the extracellular substrate.

165

166

167 (This article was submitted to an online preprint archive (47))

168

169

## 170 **RESULTS**

171 **Description of putative outer membrane electron conduit gene clusters.** At least  
172 five loci can be identified in the *G. sulfurreducens* genome encoding putative *c*-type  
173 cytochrome electron conduits. This identification is based on three key elements; (1) a



174 multiheme periplasmic *c*-type cytochrome, (2) an outer membrane integral protein with  
175 transmembrane  $\beta$ -sheets, and (3) one or more outer membrane lipoproteins with redox  
176 cofactors (Fig. 1A). Two of these regions correspond to the well-studied OmcB-based  
177 (*ombB-omaB-omcB*, GSU2739-2737) conduit and its near-identical duplicate OmcC-  
178 based operon immediately downstream preceded by a TetR-family repressor partially  
179 truncated in its DNA-binding domain (*orfS-ombC-omaC-omcC*, GSU2733-2731). For  
180 clarity, and due to the fact that *omaBC* and *ombBC* are identical, this region is referred  
181 to as the “*omcBC*” cluster. The well-characterized duplicate *omcBC* cluster was deleted  
182 as a single unit (see also Materials and Methods for additional information about the  
183 tendency of identical genes within this region to recombine during mutant construction  
184 and efforts taken to verify proper removal and reconstruction of *omcBC* genes).

185

186 The *ext* genes comprise three new clusters, named for their putative roles in  
187 extracellular electron transfer (46). Relative protein orientations were predicted using a  
188 combination of protein localization prediction software (48), integral membrane  
189 prediction software (49), and lipid attachment site prediction software (50). The  
190 *extABCD* (GSU2645-2642) cluster encodes ExtA, a periplasmic dodecaheme *c*-type  
191 cytochrome, ExtB, an outer membrane integral protein with 18 trans-membrane  
192 domains, and ExtCD, two outer membrane lipoprotein *c*-type cytochromes with 5 and 12  
193 heme binding sites, respectively. The second cluster, *extEFG* (GSU2726-2724),  
194 encodes ExtE, an outer membrane integral protein with 21 trans-membrane domains,  
195 ExtF, an outer membrane lipoprotein pentaheme *c*-type cytochrome, and ExtG, a  
196 periplasmic dodecaheme *c*-type cytochrome. Kanamycin insertions in ExtG have been

197 shown to affect Fe(III)-oxide reduction, which in some annotations is referred to as  
198 OmcV (51) despite its predicted periplasmic localization. For consistency with the  
199 surrounding operon and to distinguish it from outer membrane cytochromes, the name  
200 ExtG will be used in this work. The final cluster, *extHIJKL* (GSU2940-2936) lacks an  
201 outer membrane *c*-type cytochrome, but encodes ExtH, a rhodanese-family lipoprotein,  
202 ExtI, a 21 trans-membrane domain outer membrane integral protein, ExtJ, a small  
203 periplasmic protein, and ExtKL, a periplasmic pentaheme *c*-type cytochrome followed  
204 by a small hypothetical protein. A TGA stop codon encoding a predicted rare  
205 selenocystine amino acid separates ExtK and ExtL, thus they may encode a single  
206 protein (52).

207

208 A significant difference between *G. sulfurreducens* Ext clusters and the *S. oneidensis*  
209 Mtr conduits (35), is that the *mtr* clusters in *S. oneidensis* are paralogs. The periplasmic  
210 MtrA and MtrD cytochromes share over 50% identity, are similar in size and heme  
211 content, and can cross-complement (53). The lipoprotein outer surface cytochromes of  
212 *Shewanella* also demonstrate high sequence, functional, and structural conservation  
213 (32, 53–55). In contrast, no component of the Ext or OmcB complexes share any  
214 homology. For example, the predicted periplasmic *c*-type cytochromes ExtA, ExtG,  
215 ExtK, and OmaB vary in size from 25 to 72 kDa, contain 5 to 15 hemes, and share 18%-  
216 26% identity (Fig. 1B).

217

218 To screen for physiological roles of these loci, single cluster mutants were first  
219 constructed in an isogenic background, comprising  $\Delta extABCD$ ,  $\Delta extEFG$ ,  $\Delta extHIJKL$ ,

220 and  $\Delta ombB-omaB-omcB-orfS-ombC-omaC-omcC$  (abbreviated as  $\Delta omcBC$ ) mutants.  
221 Previous studies have reported complementary roles of OmcB and OmcC (43, 45), thus  
222 the entire *omcBC* cluster was removed to screen for conditions under which this pair of  
223 homologous conduits were necessary. As these single mutant strains lacked any  
224 antibiotic cassettes, they could be used as backgrounds for further double and triple  
225 deletions. Multiple cluster deletion mutants leaving only one conduit cluster on the  
226 genome are referred to by their remaining cluster, e.g. “*extABCD*<sup>+</sup>” contains only  
227 *extABCD* and is constructed by  $\Delta extEFG \Delta extHIJKL \Delta omcBC$ , while the mutant lacking  
228 all *extABCD*, *extEFG*, *extHIJKL*, *omcB*-based and *omcC*-based clusters is referred to as  
229 “ $\Delta 5$ ”. After whole-genome resequencing of all terminal strains containing single clusters  
230 and the strain missing all clusters (such as *extABCD*<sup>+</sup> and  $\Delta 5$ ) to verify no off-target  
231 mutations accumulated during the many rounds of insertion and recombination, all of  
232 these strains were tested under six different extracellular growth conditions varying in  
233 solubility, chemical composition, and redox potential.

234

235 **Cells lacking single gene clusters have only partial reduction defects with Fe(III)**  
236 **citrate.** Soluble Fe(III) citrate was the simplest extracellular electron acceptor tested in  
237 this study, requiring no attachment to a surface, and requiring no appendages such as a  
238 pili or secreted cytochromes for reduction. Under these conditions, no single cluster  
239 deletion eliminated the majority of soluble Fe(III) citrate reduction. The most severe  
240 defect was observed in the  $\Delta omcBC$  cluster mutant, which grew slower than any other  
241 single mutant and reduced only 60% of Fe(III) citrate compared to wild type (Fig. 2A).  
242 Minor defects were also observed for  $\Delta extEFG$  and  $\Delta extHIJKL$ , while  $\Delta extABCD$

243 reduced Fe(III) citrate at wild-type levels. These results suggested that more than one  
244 cluster was necessary for wild type soluble Fe(III) reduction.

245

246 **Any one gene cluster is sufficient for partial Fe(III) citrate reduction, and deletion**

247 **of all 5 clusters eliminates electron transfer to this substrate.** Deletion of the full

248 suite of clusters was the only combination that eliminated all residual electron transfer to

249 Fe(III) citrate (Fig. 2B). When multiple-deletion strains still containing one cluster were

250 tested for Fe(III) citrate reduction, results supported key roles for *omcBC* and *extABCD*

251 in soluble metal reduction, and little involvement by *extEFG* or *extHIJKL*. For example,

252 Fe(III) citrate reduction by *omcBC*<sup>+</sup> and *extABCD*<sup>+</sup> was comparable to that of wild type,

253 while *extEFG*<sup>+</sup> and *extHIJKL*<sup>+</sup> strains reduced Fe(III) citrate to just 20% of wild type.

254

255 **Only strains lacking both *omcBC* and *extABCD* had a significant defect in Fe(III)**

256 **citrate reduction.** Because  $\Delta omcBC$  demonstrated the largest defect in Fe(III) citrate

257 reduction, additional deletions in this background were tested for their ability to reduce

258 this substrate (Fig. 2C). Only the double cluster deletion mutant  $\Delta omcBC \Delta extABCD$

259 reduced Fe(III) citrate at a significantly lower rate compared to the  $\Delta omcBC$  strain,

260 which agreed with the robust growth seen in strains containing only *omcBC*<sup>+</sup> or

261 *extABCD*<sup>+</sup>. The  $\Delta omcBC \Delta extABCD$  mutant (still containing both *extEFG* and *extHIJKL*)

262 reduced Fe(III) citrate poorly, to the same level as their single-cluster strains containing

263 only *extEFG*<sup>+</sup> or *extHIJKL*<sup>+</sup> (Fig. 1B vs. Fig. 2C). These data suggested that when both

264 *extEFG* and *extHIJKL* remained in the genome, their contribution was not additive.

265

266 Not shown in Fig 2 is metal reduction data for intermediate deletion mutants with no  
267 additional phenotype such as  $\Delta extEFG \Delta extHIJKL$ . Experiments performed after such  
268 double mutants were constructed revealed no changes that deviated from wild type or  
269 their parent single-cluster deletions. Only intermediate strains with additive phenotypes,  
270 such as strains in the  $\Delta omcBC$  background, are shown in Fig 2.

271  
272 **Expression of single conduit clusters from vectors is sufficient to recover Fe(III)**  
273 **citrate reduction.** When compared to empty-vector controls, complementation of the  
274  $\Delta 5$  strain with single *omcB* (as *ombB-omaB-omcB*) or *extABCD* clusters restored Fe(III)  
275 citrate reduction to levels within 90% of the respective *omcBC*<sup>+</sup> and *extABCD*<sup>+</sup> strains  
276 (Fig. 2D). Previous studies have also shown that expression of only the *omcB*-based  
277 cluster is sufficient to rescue ferric citrate reduction defects in a  $\Delta omcBC$  strain (45), but  
278 *extABCD* has never been used to rescue a respiratory phenotype. These data are the  
279 first evidence that a putative outer membrane complex other than those encoded in  
280 *omcB* could be sufficient for extracellular metal reduction in *Geobacter*.

281  
282 **Only strains lacking multiple gene clusters have significant defects in Fe(III)- and**  
283 **Mn(IV)-oxide reduction.** Particulate metal oxides represent substrates of additional  
284 complexity, requiring pili and additional cytochromes for long-range electron transfer to  
285 particles or surfaces after transmembrane electron transfer. Because they are not  
286 hypothesized to act as the interface with distant electron acceptors, it was possible the  
287 outer membrane complex mutants would show less specificity during reduction of Fe(III)  
288 or Mn(IV) oxides. However, trends remained similar to Fe(III) citrate, where deletion of

289 single conduit clusters in *G. sulfurreducens* only had modest effects on metal oxide  
290 reduction (Fig. 3A and C) and additional conduit cluster deletions were needed to  
291 severely impact growth (Fig. 3B and D). The most severe defect was again observed in  
292 the  $\Delta omcBC$  cluster mutant, which reduced 68% of Fe(III)-oxide compared to wild type  
293 (Fig. 3A). Minor defects were observed for single  $\Delta extEFG$  and  $\Delta extHIJKL$  deletions,  
294 while  $\Delta extABCD$  reduced Fe(III)-oxide near wild-type levels. In contrast, none of the  
295 single mutants displayed defects with Mn(IV)-oxides (Fig. 3C).

296  
297 Unlike soluble metal reduction, however, results supported roles for *omcBC* and *extEFG*  
298 in metal oxide reduction and little involvement by *extABCD*. For example, in strains  
299 containing only one cluster, Fe(III)-oxide reduction by *omcBC*<sup>+</sup> was nearly 80% of wild  
300 type, *extEFG*<sup>+</sup> was over 60%, but the *extABCD*<sup>+</sup> strain reduced less than 30% of wild  
301 type. Similarly, the *omcBC*<sup>+</sup>, *extEFG*<sup>+</sup>, and *extHIJKL*<sup>+</sup> strains achieved about 80% of  
302 wild type Mn(IV)-reduction at 80 hours, but the *extABCD*<sup>+</sup> strain again displayed poor  
303 Mn(IV)-oxide reduction. As with soluble metal reduction, deletion of the full suite of  
304 clusters was necessary to eliminate all residual electron transfer to either Fe(III)- or  
305 Mn(IV)-oxides (Fig. 3B and D).

306  
307 **Only strains lacking both *omcBC* and *extEFG* had a significant defect in Fe(III)-**  
308 **and Mn(IV)-oxide reduction.** Since  $\Delta omcBC$  demonstrated the largest defect in Fe(III)-  
309 oxide reduction, additional deletions in this background were tested during Fe(III) and  
310 Mn(IV)-oxide reduction (Fig. 4). Fe(III)-oxide reduction by  $\Delta omcBC \Delta extEFG$  was less  
311 than 25% of wild type, while the  $\Delta omcBC \Delta extABCD$ , and  $\Delta omcBC \Delta extHIJKL$  strains

312 still reduced Fe(III)-oxides similar to the  $\Delta omcBC$  strain. The additive effect from  
313  $\Delta extEFG$  agreed with data from mutants containing single clusters, where  $omcBC^+$ ,  
314 and  $extEFG^+$  showed the best reduction. The  $\Delta omcBC \Delta extEFG$  strain also had a  
315 severe Mn(IV)-oxide reduction defect. However, unlike Fe(III)-oxide reduction, the  
316  $\Delta omcBC \Delta extABCD$  and  $\Delta omcBC \Delta extHIJKL$  double deletion strains had only a modest  
317 Mn(IV) reduction defect, suggesting higher contributions of  $extABCD$  and  $extHIJKL$   
318 clusters during Mn(IV) compared to Fe(III) reduction.

319

320 The poor growth of the  $\Delta omcBC \Delta extEFG$  mutant with insoluble metals was surprising,  
321 since this strain still contained  $extHIJKL$ . When  $extHIJKL$  was the only cluster  
322 remaining, the  $extHIJKL^+$  strain reduced up to 50% of Fe(III)-oxide and 75% of Mn(IV)-  
323 oxide compared to wild type (Fig. 3B and D; Table 2). This was a rare case where  
324 performance of a mutant containing the single cluster performed better than predicted  
325 by single and double mutants, and raises the hypothesis that  $extHIJKL$  expression or  
326 function is partially inhibited by the presence of  $extABCD$ . No other  $ext$  or  $omc$  cluster  
327 showed this kind of behavior with soluble or insoluble metals.

328

329 **Expression of single conduit clusters partially recovers Fe(III)- and Mn(IV)-oxide**  
330 **reduction.** Plasmids containing constitutive  $ombB-omaB-omcB$  or  $extABCD$  clusters  
331 resulted in partial recovery (Fig. 5), consistent with the intermediate phenotypes  
332 displayed by mutants retaining these single clusters on the genome. Expression of the  
333  $omcB$  cluster reestablished Fe(III)-oxide reduction to a level less than that seen in the  
334  $omcBC^+$  strain containing the full duplicated cluster in its original context, suggesting

335 that both *omcB* and *omcC* are necessary (Fig. 4B). Expressing *extABCD* from a plasmid  
336 restored Fe(III)-oxide reduction in the  $\Delta 5$  strain near the low levels of the *extABCD*<sup>+</sup>  
337 strain, and reduction of Mn(IV)-oxides by *omcB* or *extABCD*-expressing strains was  
338 even lower. These data again agreed with the partial reduction phenotype of mutant  
339 strains containing only *extABCD*.

340

341 **Mutants lacking *extABCD* are defective in electrode growth at all redox potentials,**  
342 **while mutants containing only *extABCD* outperform wild type.** In contrast to metal  
343 reduction, when strains were grown as biofilms on electrodes poised at high (0.24 V vs.  
344 SHE) or low (-0.1 V, (46)) redox potentials, only  $\Delta extABCD$  mutants showed a defect in  
345 both the rate and extent of growth. Mutants lacking the *omcBC* and *extEFG* clusters  
346 grew at similar rates as wild type, while  $\Delta extHIJKL$  demonstrated a lag before growing  
347 with a similar doubling time as wild type (Fig. 6A). In all experiments,  $\Delta extABCD$  grew  
348 poorly, without a clear exponential phase. The apparent doubling time of  $\Delta extABCD$   
349 was longer than 20 h, or over 3-fold slower than wild type, and only reached 20% of wild  
350 type final current density, or  $116 \pm 33 \mu\text{A}/\text{cm}^2$  vs.  $557 \pm 44 \mu\text{A}/\text{cm}^2$  ( $n \geq 5$  per strain).

351

352 Mutants containing only one gene cluster (*extABCD*<sup>+</sup>, *extEFG*<sup>+</sup>, *extHIJKL*<sup>+</sup>, *omcBC*<sup>+</sup>) as  
353 well as a mutant lacking all gene clusters ( $\Delta 5$ ) were then analyzed for growth on  
354 electrodes. The  $\Delta 5$  mutant grew at the same low, nonexponential rate as the  $\Delta extABCD$   
355 single mutant at both redox potentials, suggesting that none of the additional clusters  
356 were responsible for residual growth rate originally seen in  $\Delta extABCD$ . In contrast,  
357 *extABCD*<sup>+</sup> grew faster than wild type ( $4.5 \pm 0.2$  h vs.  $6.5 \pm 0.3$  h doubling time,  $n \geq 9$ )



358 and reached a final current density 40% higher than wild type ( $768 \pm 52 \mu\text{A}/\text{cm}^2$  vs.  $557$   
359  $\pm 44\mu\text{A}/\text{cm}^2$ ,  $n \geq 9$ ). All other multiple-deletion strains containing only one cluster grew as  
360 poorly as the  $\Delta 5$  mutant, further indicating that under these conditions, *extEFG*,  
361 *extHIJKL*, and *omcBC* were not necessary or sufficient to restore electron transfer to  
362 electrodes (Fig. 6B). We were unable to identify the origin of the slow growth enabling  
363 residual electron transfer to electrodes, although *G. sulfurreducens* contains at least 3  
364 other multiheme cytochrome-rich regions with conduit-like signatures that remain to be  
365 examined.

366

367 **A 5-conduit deletion mutant expressing *extABCD* has a faster growth rate on**  
368 **electrodes than wild type.** To further investigate the specific effect of *extABCD* on  
369 electrode growth, *extABCD* was provided on a vector in the  $\Delta 5$  strain. The 3-gene *omcB*  
370 conduit cluster (*ombB-omaB-omcB*) was also placed in the  $\Delta 5$  strain using the same  
371 vector, and both were compared to wild type cells containing the empty vector. While  
372 the plasmid is stable for multiple generations, routine vector maintenance requires  
373 growth with kanamycin, and kanamycin carry-over into biofilm electrode experiments is  
374 reported to have deleterious effects on electrode growth (23, 56). Thus, we first re-  
375 examined growth of the empty vector strain. When selective levels of kanamycin ( $200$   
376  $\mu\text{g}\cdot\text{ml}^{-1}$ ) were present in electrode reactors, colonization slowed and final current  
377 production decreased 74% even though cells carried a kanamycin resistance cassette.  
378 At levels resulting from carry-over during passage of cells into the electrode reactor ( $5$   
379  $\mu\text{g}\cdot\text{ml}^{-1}$ ) growth rate of vector-containing cells was not affected, but final current was  
380 decreased up to 30%, suggesting interference with biofilm formation rather than

381 respiration (Fig. 7A). All subsequent complementation was performed in the presence of  
382  $5 \mu\text{g}\cdot\text{ml}^{-1}$  residual kanamycin and compared to these controls.

383  
384 Expressing the *omcB* conduit cluster in the  $\Delta 5$  strain failed to increase growth with  
385 electrodes as electron acceptors. These data were consistent with the lack of an effect  
386 seen in  $\Delta omcBC$  deletions, and the poor growth of *omcBC*<sup>+</sup> mutants that still contained  
387 both the OmcB and OmcC clusters in their native genomic context (Fig. 7B). In contrast,  
388 when *extABCD* was expressed on the same vector in the  $\Delta 5$  background, colonization  
389 was faster and cells reached a higher final current density compared to wild type  
390 carrying the empty vector ( $421 \pm 89 \mu\text{A}/\text{cm}^2$  vs.  $297 \pm 11 \mu\text{A}/\text{cm}^2$ ,  $n=3$ ) (Fig. 7B). This  
391 enhancement by plasmid-expressed *extABCD* (141% of wild type with empty vector)  
392 was similar to the positive effect observed in the *extABCD*<sup>+</sup> strain (137% of wild type)  
393 (Fig. 6B), and further supported the hypothesis that *extABCD* is both necessary and  
394 sufficient during growth with electrodes.

395  
396 Growth of any two-conduit deletion mutant was unchanged from single-cluster strains  
397 (Fig. S1). For example, just as the mutant lacking *extABCD* produced the same  
398 phenotype as the  $\Delta 5$  strain (Fig. 6), deletion of a second cluster from the  $\Delta extABCD$   
399 strain produced similar results as  $\Delta extABCD$  alone, and no two-cluster combination of  
400 *omcBC*, *extEFG* or *extHIJKL* showed defects to suggest they were required during  
401 electrode growth conditions, or to indicate their presence affected expression of  
402 *extABCD*. The  $\Delta extABCD$  and  $\Delta 5$  strains were also monitored during extended

403 incubation times to determine if final current density increased after a prolonged  
404 incubation period, but current remained unchanged even after 200 h (Fig. S2).

405

406 **Transcriptomic analysis reveals no differential expression of putative conduit**  
407 **clusters during growth on electrodes, or off-target expression effects in**

408 ***extABCD*<sup>+</sup>**. The importance of the *extABCD* gene cluster during electrode growth was  
409 first discovered via genetic experiments (46), but none of the *ext* genes described here  
410 were highlighted or examined in earlier studies measuring transcriptional or proteomic  
411 changes. Data is available from microarray studies comparing stationary phase  
412 electrode biofilms with >4 day old fumarate biofilms grown under electron donor  
413 limitation (24), or comparing stationary phase electrode biofilms with Fe(III) citrate  
414 grown cells (57). As mature biofilms contain many layers of inactive or slowly growing  
415 cells (58), we conducted new experiments capturing both fumarate- and electrode-  
416 grown cells during exponential growth to determine absolute levels of transcriptional  
417 abundance for *ext* and *omc* genes, using RNAseq.

418

419 Figure 8A compares expression levels of wild type *G. sulfurreducens* during exponential  
420 fumarate growth to exponential growth with electrodes, using data averaged from at  
421 least 2 biological replicates under each condition. Despite the fact that this represents a  
422 shift from planktonic cells using an intracellularly reduced acceptor to biofilms using an  
423 extracellular acceptor, few genes undergo changes  $\pm \text{Log}_2 > 2$ . Highlighted in Fig 8A  
424 are all annotated cytochromes and pili genes reported to be involved in metal or

425 electrode respiration, showing that nearly all of these were constitutively expressed  
426 between the two laboratory conditions of non-limiting electron acceptor.  
427  
428 Compared to the highly expressed *omcBC* genes, genes for *extABCD* and other *ext*  
429 clusters were expressed at levels equivalent to only 10-20% of *omcB* under both  
430 conditions, which may explain OmcB's dominance in prior gel-based heme stain  
431 identification and proteomic analyses. We did observe an overall trend of increased  
432 cytochrome and electron transfer gene expression during growth on electrodes,  
433 reflecting a general increase in extracellular respiratory processes, but these changes  
434 occurred in both essential and nonessential genes. Genes encoding the characterized  
435 inner membrane electron transfer proteins ImcH or CbcL also did not change  
436 significantly in expression between these two conditions, nor did any genes for  
437 periplasmic cytochromes or pili components known to be essential (18, 22, 23). As has  
438 been shown before (24), the well-characterized extracellular cytochrome *omcZ* was  
439 upregulated over 8-fold during electrode reduction, and a putative inner membrane *c*-  
440 and *b*-type cytochrome similar to CbcL that is up-regulated during Fe(III) reduction  
441 (*cbcBA*) also increased over 30-fold (51) (Fig. 8A). A table providing RPKM data for all  
442 genes studied in this paper, along with *omcZ* and *cbcBA*, is provided in Fig 8B. As none  
443 of the *extABCDEFGHIJKL* genes were strongly induced or repressed during electrode  
444 growth, and these genes were generally expressed at levels  $1/10^{\text{th}}$  of the *omcBC* locus,  
445 their absence from prior differential expression analyses is understandable.  
446

447 A second question that often arises in the study of complex phenotypes is whether  
448 deletion of an important or highly expressed cluster such as *omcBC* affects expression  
449 of other genes, especially as phenotypes such as biofilm growth require secretion of  
450 complexes to the outer membrane, adhesion of cells to surfaces, and production of  
451 extracellular proteins such as pili (59–61). The fact that the *extABCD*<sup>+</sup> strain lacking 15  
452 different genes always grew faster than wild type, and produced more current than wild  
453 type, raised a significant question regarding possible off-target effects on other aspects  
454 of metabolism. Therefore, the transcriptome of the *extABCD*<sup>+</sup> strain was analyzed under  
455 both fumarate- and electrode-respiring conditions, and compared to wild type.

456

457 No significant increase or decrease in expression of any previously studied electron  
458 transfer proteins were found during growth in fumarate, or during exponential growth on  
459 electrodes, when the *extABCD*<sup>+</sup> strain was compared to wild type (Fig. 8C-D). This  
460 further suggested the increased growth rate was not due to higher expression of an  
461 unknown gene enabling electron transfer or attachment. It also underscored the trend in  
462 *Geobacter* that many genes such as *omcB* are among the most highly expressed under  
463 laboratory conditions, yet these expression levels have not correlated with essentiality  
464 or function. The full data sets plotted on Figure 8 can be found in Table S2.

465

#### 466 **Summary of phenotypes for all Omc and Ext electron conduit gene cluster**

467 **mutants.** Table 2 summarizes all extracellular reduction phenotypes of single cluster  
468 deletions and deletions leaving only one conduit on the genome, adjusted to wild type  
469 performance. Each gene cluster was necessary under different conditions. Many of the

470 recently described *ext* gene clusters were necessary for wild-type metal reduction, yet  
471 few were sufficient. For example, *extEFG* and *extHIJKL* were necessary for Fe(III)  
472 citrate reduction, as strains lacking these clusters only reduced ~65% of wild type  
473 levels. But when only *extEFG* or only *extHIJKL* was present, they were not sufficient to  
474 reduce Fe(III) citrate at wild type levels. In contrast, the *omcBC* cluster or the *extABCD*  
475 cluster alone was necessary for Fe(III) citrate reduction, and the *extABCD* cluster alone  
476 was also sufficient for electrode growth. Deletion of all five conduit clusters resulted in  
477 complete elimination of metal reduction abilities, while some residual activity remained  
478 when the same  $\Delta 5$  strain was grown using electrodes as terminal electron acceptor.  
479 These comparisons show each gene cluster is necessary under at least one of the  
480 conditions studied, and provides evidence for additional undiscovered mechanisms  
481 enabling transmembrane electron transfer during electrode growth.

482

## 483 **DISCUSSION**

484

485 Sequencing of the *G. sulfurreducens* genome revealed an unprecedented number of  
486 electron transfer proteins, with twice as many genes dedicated to respiratory and redox  
487 reactions as organisms with similarly-sized genomes (62). Out of 111 *c*-type  
488 cytochromes, 43 had no known homolog, and many were predicted to reside in the  
489 outer membrane. The large complement of outer membrane redox proteins in *G.*  
490 *sulfurreducens* became even more of an anomaly as the simpler electron transfer  
491 strategy of metal-reducing *S. oneidensis* emerged. If *Shewanella* only requires a single  
492 inner membrane cytochrome and a single outer membrane conduit to reduce a

493 multitude of substrates (36, 39, 40, 53), why does *Geobacter* have so many  
494 cytochromes?  
495  
496 Evidence that more than one *G. sulfurreducens* outer membrane pathway exists for  
497 reduction of extracellular substrates has accumulated in at least 11 separate studies  
498 since discovery of OmcB (34, 43, 45). Deletion of *omcB* impacted Fe(III)-reduction, but  
499 had little effect on U(IV) or Mn(IV)-oxide reduction (51, 63). A  $\Delta omcB$  suppressor strain  
500 evolved for improved Fe(III)-citrate growth still reduced Fe(III)-oxides poorly (44).  
501 Strains lacking *omcB* grew similar to wild type on electrodes in four different studies,  
502 (24, 29, 57, 64), and OmcB abundance was shown to be lowest on cells near electrodes  
503 (65). An insertional mutant lacking six secreted or outer membrane-associated  
504 cytochromes in addition to OmcB still demonstrated Fe(III)-oxide reduction (66). After  
505 replacing the entire *omcBC* region with an antibiotic cassette and still finding residual  
506 Fe(III)-reducing ability, Liu *et al.* (2015) speculated that other *c*-type cytochrome  
507 conduit-like clusters in the genome might be active. Most recently, Tn-seq analysis of  
508 electrode-grown cells found little effect of *omcB* cluster mutations, yet noted significant  
509 defects from insertions in unstudied clusters with *c*-type cytochrome features (46). This  
510 combined evidence led us to seek alternative conduit gene clusters that could address  
511 both the longstanding mystery of growth by *omcB* mutants and the complexity of  
512 electron transfer proteins in the *Geobacter* genome.  
513  
514 The genetic analysis presented here supports a role for these unstudied conduit gene  
515 clusters during extracellular respiration. All mutants still containing at least one cluster

516 retained a partial ability to reduce metals, while deletion of the entire *omcBC* region,  
517 plus all three *ext* clusters, finally was able to eliminate metal reduction. This need to  
518 delete more than one cluster helps explain variability reported with other mutants, and  
519 the rapid evolution of suppressors in  $\Delta omcB$  mutants.

520

521 In the case of electrodes at both high and low potential, only deletion of *extABCD*  
522 altered phenotypes. Additionally, a strain with only *extABCD* remaining on the genome  
523 outperformed wild type in terms of growth rate and final current density when grown on  
524 electrodes. Since expression of *extABCD* was also able to restore reduction of the  
525 soluble acceptor Fe(III) citrate, this cluster can confer the phenotype of extracellular  
526 respiration under a condition where pili and secreted cytochromes are not known to be  
527 important. Overall, these data show that for all tested metal acceptors, more than one  
528 conduit cluster is necessary for wild type levels of reduction, any one cluster can  
529 support partial reduction of many metals, and only one cluster can be linked to electrode  
530 respiration.

531

532 Genetic analyses are typically a first step, designed to reveal which genes are  
533 necessary for a phenotype, and worthy of further study. Biochemical and biophysical  
534 analyses will be needed to prove (1) if products of *ext* gene clusters indeed function as  
535 conduits to transfer electrons across the outer membrane, and (2) identify the proteins  
536 or metals these complexes interact with to explain why these clusters seem so tightly  
537 linked to growth with certain substrates. Expression analyses failed to detect large  
538 differences in *ext* or *omcBC* family genes during transitions between acceptors, arguing



539 against changes in expression as an explanation for specificity. Our ability to  
540 complement growth with electrodes in the  $\Delta 5$  mutant by expressing *extABCD* from a  
541 vector, while the *omcB* conduit could not complement growth, further argues against  
542 expression differences causing these phenotypes. Unknown post-transcriptional events  
543 could be caused by the absence of different gene clusters, but the genetic conclusion  
544 that these gene clusters are necessary remains the same.

545

546 To reduce metal particles or surfaces likely requires each membrane-bound complex to  
547 interact with extracellular proteins such as OmcZ, OmcS, PgcA, or pili, to aid transfer of  
548 electrons to the final destination. If these partner proteins are not expressed or made  
549 available under all conditions, an outer membrane complex may not be capable of  
550 contributing to respiration. In the case of soluble metals such as Fe(III) citrate, conduit  
551 complexes should be able to directly reduce the acceptor, making apparent specificity  
552 more likely due the ability of the complex(es) to interact with Fe(III) directly.

553

554 It is also important to consider lessons from insertional deletions in *G. sulfurreducens*,  
555 such as the diheme peroxidase MacA. Initially hypothesized to be an inner membrane  
556 quinone oxoreductase, based on the defective phenotype of  $\Delta macA$  mutants during  
557 Fe(III)-citrate reduction (67), this phenotype was later explained by  $\Delta macA$  mutants not  
558 expressing *omcB*, as the  $\Delta macA$  phenotype could be rescued by expressing *omcB* from  
559 a vector (68, 69). As MacA is now known to instead be a soluble peroxidase, oxidative  
560 stress in early  $\Delta macA$  studied could have resulted in global downregulation of  
561 cytochromes. In our work, the availability of every combination of gene cluster deletion

562 and acceptor condition allows many general downregulation hypotheses to be  
563 eliminated. For example, if deletion of *extABCD* suppressed production of pili or  
564 cytochromes such as OmcS, all  $\Delta$ *extABCD* mutants would be predicted to show both an  
565 electrode and metal oxide defect, which we did not observe.

566

567 Initial transcriptomic surveys also failed to find severe or off-target transcriptional effects  
568 on known electron transfer proteins from deletion of *ombB-omaB-omcB-orfS-ombC-*  
569 *omaC-omcC*, *extEFG*, or *extHIJKL*, that could explain the enhanced growth of  
570 *extABCD*<sup>+</sup>. The fact that only the *ombB-omaB-omcB* cluster was necessary to restore  
571 Fe(III) citrate reduction further indicated that *orfS* was not essential. However, all of  
572 these deletions removed many parts of the genome which were not tested for  
573 complementation by single genes, leaving open the possibility of regulatory interactions.  
574 Also, in a complex system such as this, post-translational events such as polymerization  
575 of pilin monomers into filaments, extracellular cytochrome secretion could be affected  
576 by the absence of specific proteins under specific conditions. It is difficult to detect  
577 negative interactions via RNAseq or proteomic analyses when mutants fail to grow, but  
578 such effects should be addressed in future suppressor and heterologous expression  
579 studies, now that these clusters have been identified.

580

581 **Insights from similar gene clusters in related organisms.** It remains difficult to  
582 predict any function for multiheme cytochromes based on sequence alone, so their  
583 genetic context may reveal other clues to their role, and aid identification of such  
584 clusters in other genomes. None of the *ext* regions fits the pattern of the *mtr* 3-gene

585 'cytochrome conduit' operon of one small (~40 kDa) periplasmic cytochrome, an integral  
586 outer membrane protein, and one large (>90 kDa) lipoprotein cytochrome. For example,  
587 *extABCD* includes two small lipoprotein cytochromes, *extEFG* is part of a hydrogenase-  
588 family transcriptional unit, and *extHIJKL* contains a rhodanese-like lipoprotein instead of  
589 an extracellular cytochrome (Fig. 1).

590

591 Specifically, the transcriptional unit beginning with *extEFG* includes a homolog of YedY-  
592 family periplasmic protein repair systems described in *E. coli* (70), followed by a NiFe  
593 hydrogenase similar to bidirectional Hox hydrogenases used to recycle reducing  
594 equivalents in Cyanobacteria (71–73). Rhodanase-like proteins related to ExtH typically  
595 are involved in sulfur metabolism (74–76) and an outer surface ExtH/rhodanese-like  
596 protein is linked to extracellular oxidation of metal sulfides by *Acidithiobacillus*  
597 *ferrooxidans* (77). Deletion of *extI* in *G. sulfurreducens* causes a severe defect in  
598 selenite and tellurite reduction (78). These links to metabolism of hydrogen, sulfur, and  
599 other oxyanions suggest roles outside of metal reduction, and future genomic searches  
600 for electron conduit clusters should consider the possibility of non-cytochrome  
601 components, such as FeS clusters, as the exposed lipoprotein.

602

603 Now that genes from *ext* operons can be used in searches of other genomes, an  
604 interesting pattern emerges in putative conduit regions throughout Desulfuromonadales  
605 strains isolated from freshwater, saline, subsurface, and fuel cell environments (Fig. 9).  
606 In about 1/3 of cases, an entire cluster is conserved intact, such as *extABCD* in *G.*  
607 *anodireducens*, *G. soli*, and *G. pickeringii* (Fig. 9B). However, when differences exist,

608 they are typically non-orthologous replacements of the outer surface lipoprotein, such  
609 as where *extABC* is followed by a new cytochrome in *G. metallireducens*,  
610 *Geoalkalibacter ferrihydriticus*, and *Desulfuromonas soudanensis*. Conservation of the  
611 periplasmic cytochrome with replacement of the outer surface redox lipoprotein also  
612 occurs frequently in the *omcB* and *extHIJKL* clusters (Fig 9A and D). For example, of 18  
613 *extHIJKL* regions, 10 contain a different extracellular rhodanese-like protein with  
614 *extIJKL*, each with less than 40% identity to *extH*. This remarkable variability in  
615 extracellular components, compared to conservation of periplasmic redox proteins,  
616 suggests much higher rates of gene transfer and replacement of domains that are  
617 exposed to electron acceptors and the external environment.

618

619 **Summary.** The data presented here significantly expands the number of genes  
620 encoding outer membrane redox proteins necessary during electron transfer in *G.*  
621 *sulfurreducens* and highlights a key difference in the *Geobacter* electron transfer  
622 strategy compared to other model organisms. In general, the pattern of multiple genes  
623 encoding seemingly overlapping or redundant roles is less like solitary respiratory  
624 reductases, and more reminiscent of systems in cellulolytic bacteria that produce  
625 numerous similar  $\beta$ -glucosidases to attack a constantly changing polysaccharide  
626 substrate (36, 40, 79). A need for multiple outer membrane strategies could be a  
627 response to the complexity of metal oxides during reduction; minerals rapidly diversify to  
628 become multiphase assemblages of more crystalline phases, the cell:metal interface  
629 can become enriched in Fe(II), and organic materials can bind to alter the surface (80–  
630 82). Constitutively expressing an array of electron transfer pathways could make cells

631 competitive at all stages with all electron acceptors, allowing *Geobacter* to outgrow  
632 more specialized organisms during rapid perturbations in the environment.  
633

## 634 **EXPERIMENTAL PROCEDURES**

635

### 636 *Growth conditions.*

637 All experiments were performed with our laboratory strain of *Geobacter sulfurreducens*

638 PCA as freshly streaked single colonies from freezer stocks. Anaerobic NB medium

639 (0.38 g/L KCl, 0.2 g/L NH<sub>4</sub>Cl, 0.069 g/L NaH<sub>2</sub>PO<sub>4</sub>H<sub>2</sub>O, 0.04 g/L CaCl<sub>2</sub>2H<sub>2</sub>O, 0.2 g/L

640 MgSO<sub>4</sub>7H<sub>2</sub>O, 1% v/v trace mineral mix, pH 6.8, buffered with 2 g/L NaHCO<sub>3</sub> and flushed

641 with 20:80 N<sub>2</sub>:CO<sub>2</sub> gas mix) with 20 mM acetate as electron donor, 40 mM fumarate as

642 electron acceptor was used to grow liquid cultures from colony picks. For metal

643 reduction assays, 20 mM acetate was added with either 55 mM Fe(III) citrate, ~20 mM

644 birnessite (Mn(IV)-oxide), or ~70 mM Fe(III)-oxide freshly precipitated from FeCl<sub>2</sub> by

645 addition of NaOH and incubation at pH 7 for 1 h before washing in DI water. Fe(III)-

646 oxide medium contained an increased concentration of 0.6 g/L NaH<sub>2</sub>PO<sub>4</sub>H<sub>2</sub>O to prevent

647 further crystallization of the metal after autoclaving. All experiments were carried out at

648 30°C.

649

### 650 *Deletion and complementation construction*

651 Putative conduits were identified through a genomic search for gene clusters containing

652 loci predicted to encode a β-barrel using PRED-TMBB (49), contiguous to periplasmic

653 and extracellular multiheme c-type cytochromes or other redox proteins. Localization

654 was predicted by comparing PSORT (48) and the presence/absence of lipid attachment

655 sites (50). Constructs to delete each gene cluster were designed to recombine to leave

656 the site marker-free and also non-polar when located in larger transcriptional units, with

657 most primers and plasmids for the single deletions described in Chan *et al.*, 2017. When  
658 genes were part of a larger transcriptional unit or contained an upstream promoter, it  
659 was left intact. For example, in the case of the *omcBC* cluster the transcriptional  
660 regulator *orfR* (GSU2741) was left intact, and in *extEFG* the promoter and untranslated  
661 region was left intact so as to not disrupt the downstream loci.

662

663 For deletion mutant construction, the suicide vector pK18*mobsacB* (83) with ~750 bp  
664 flanking to the target region was used to induce homologous recombination as  
665 previously described (56). Briefly, two rounds of homologous recombination were  
666 selected for. The first selection used kanamycin resistance to select for mutants with the  
667 plasmid inserted into either up or downstream regions, and the second selection used  
668 sucrose sensitivity to select for mutants that recombine the plasmid out of the  
669 chromosome, resulting in either wild type or complete deletion mutants. Deletion  
670 mutants were identified using a kanamycin sensitivity test and verified by PCR  
671 amplification targeting the region. Multiple PCR amplifications with primers in different  
672 regions were used to confirm full deletion of each gene cluster (55 and Table S1).

673

674 During this work, we found that manipulations in the *omcBC* cluster, which harbors large  
675 regions of 100% identity, frequently underwent recombination into unexpected hybrid  
676 mutants which could escape routine PCR verification. For example, when *omaB* and  
677 *omaC* genes recombined, a large hybrid operon containing *omaB* linked to *ombC-omcC*  
678 would result, and sometimes the region would recombine to produce a hybrid of the two  
679 repressors controlling expression of the region. Routine primer screening, especially

680 targeting flanking regions, failed to detect the large product. Only via use of multiple  
681 internal primers (55 and Table S1), paired with longer-read or single molecule (PacBio)  
682 sequencing, were we able to verify and isolate strains in which complete loss of the  
683 *omcBC* cluster occurred, and dispose of hybrid mutants. Whole-genome resequencing  
684 was also performed on strains containing only one cluster, such as the strain containing  
685 only *extABCD*, especially since this strain has an unexpected phenotype where it  
686 produced more current than wild type. Because these hybrid *omcBC* operon strains still  
687 contained mixed conduits and had altered expression due to disruption of the  
688 repressors upstream, verification by PCR and whole genome sequencing (especially  
689 with single-molecule techniques able to span the entire ~10 kb region) are  
690 recommended to confirm deletions of large and repetitive regions such as the *omcBC*  
691 cluster when working with this region.

692

693 Mutants lacking a single gene region were used as parent strains to build additional  
694 mutations. In this manner, six double gene-cluster deletion mutants, four triple-cluster  
695 deletion mutants and one quintuple-cluster deletion mutant lacking up to nineteen genes  
696 were constructed (Fig. 1; Table 1). For complementation strains, putative conduits were  
697 amplified using primers listed in Table S1 and inserted into the *G. sulfurreducens*  
698 expression vector pRK2-Geo2 (56), which contains a constitutive promoter  $P_{acpP}$ . The  
699 putative conduit *extABCD* was assembled into a single transcriptional unit to ensure  
700 expression.

701

702 *Electrode reduction assays*



703 Sterile three-electrode conical reactors containing 15 mL of NB with 40 mM acetate as  
704 electron donor and 50 mM NaCl to equilibrate salt concentration were flushed with a mix  
705 of N<sub>2</sub>-CO<sub>2</sub> gas (80:20, v/v) until the O<sub>2</sub> concentration reached less than 2 ppm. Liquid  
706 cultures were prepared by inoculating 1 ml liquid cultures from single colonies inside an  
707 anaerobic chamber. Once these cultures reached late exponential to stationary phase,  
708 they were used to inoculate 10 ml cultures with 10% v/v. Each reactor was then  
709 inoculated with 25% v/v from this liquid culture as it approached acceptor limitation, at  
710 an OD<sub>600</sub> between 0.48 and 0.52. Working electrodes were set at either -0.1 V or +0.24  
711 V vs SHE and average current density recorded every 12 seconds. Each liquid culture  
712 propagated from an individual colony pick served no more than two reactors, and at  
713 least three separate colonies were picked for all electrode reduction experiments for a  
714 final n ≥ 3.

715

#### 716 *Metal reduction assays*

717 NB medium with 20 mM acetate as electron donor and either 55 mM Fe(III)-citrate, ~70  
718 mM Fe(III) oxide, or ~20 mM birnessite (Mn(IV)O<sub>2</sub>) as electron acceptor was inoculated  
719 with a 0.1% inoculum of early stationary phase fumarate limited cultures. Time points  
720 were taken as necessary with anaerobic and sterile needles. These were diluted 1:10  
721 into 0.5 N HCl for the Fe(III) samples and into 2 N HCl, 4 mM FeSO<sub>4</sub> for Mn(IV)  
722 samples. Samples were diluted once more by 1:10 in the case of Fe(III) assays and by  
723 1:5 in the case of Mn(IV) assays into 0.5 N HCl. FerroZine<sup>R</sup> reagent was then used to  
724 determine the Fe(II) concentration in each sample. Original Fe(II) concentrations were  
725 calculated for Fe(III) reduction assays by accounting for dilutions and original Mn(IV)

726 concentrations were calculated by accounting for the concentration of Fe(II) oxidized by  
727 Mn(IV) based on the following:  $Mn(IV) + 2Fe(II) = Mn(II) + 2Fe(III)$ . In other words, two  
728 molecules of Fe(II) are reduced by one molecule of Mn(IV). Therefore, the increase of  
729 Fe(II) concentration over time in our samples indicates a decrease of Mn(IV), or  
730 increase of Mn(II), in a 2:1 ratio.

731

### 732 *RNAseq*

733 For liquid-grown cultures, total RNA was extracted from 10 ml of *G.*  
734 *sulfurreducens* culture grown to mid-log (0.25 – 0.3 OD<sub>600</sub>). For biofilm-grown cultures,  
735 total RNA was extracted from graphite electrodes of *G. sulfurreducens* biofilms grown to  
736 mid-log (300  $\mu A/cm^2$ ). Biofilms were rinsed to remove planktonic cells and removed  
737 from electrodes using a plastic spatula. Cell pellets from all samples were washed in  
738 RNAprotect (Qiagen) and frozen at -80°C before RNA extraction using RNeasy with on  
739 column DNase treatment (Qiagen). Ribosomal RNA was depleted using RiboZero  
740 (Illumina) by the University of Minnesota Genomics Center before stranded synthesis  
741 and sequenced on Illumina HiSeq 2500, 125 bp pair-ended mode. Residual ribosomal  
742 RNA sequences were removed before analysis using Rockhopper (84). Duplicate  
743 biological samples were analyzed for each strain. An in-house re-sequenced *G.*  
744 *sulfurreducens* genome and annotation released in a prior publication was used as  
745 reference (46, 56). Full RPKM values are in Table S2, and raw RNAseq reads are  
746 deposited in the NCBI SRA under our BioProject PRJNA290373.

747

### 748 *Homolog search and alignment*

749 Homologs to each of the individual cytochrome conduit proteins were queried on 11-30-  
750 2016 in the Integrated Microbial Genomes database (85) with a cutoff on 75% sequence  
751 length and 40% identity based on amino acid sequence within the Desulfuromonadales.  
752 A higher percent identity was demanded in this search due to the high heme binding  
753 site density with the invariable CXXCH sequence. Only ExtJ and ExtL were excluded  
754 from the search and the OmcBC region was collapsed into a single cluster due to the  
755 high identity shared between the two copies. The gene neighborhood around each  
756 homolog hit was analyzed. With a few exceptions (see Table S2), all homologs were  
757 found to be conserved in gene clusters predicted to encode cytochrome conduits and  
758 containing several additional homologs to each corresponding *G. sulfurreducens*  
759 conduit. The proteins within each homologous cytochrome conduit that did not fall within  
760 the set cutoff were aligned to the amino acid sequence of the *G. sulfurreducens*  
761 component they replaced using ClustalΩ (86).

762 **ACKNOWLEDGEMENTS**

763 We thank J. Badalamenti for sequence analysis assistance and data management. This  
764 research was supported by the Office of Naval Research (N000141210308). FJO is  
765 supported by the National Council of Science and Technology of Mexico (CONACYT).

766

767 **REFERENCES**

- 768 1. Tadanier CJ, Schreiber ME, Roller JW. 2005. Arsenic mobilization through microbially  
769 mediated deflocculation of ferrihydrite. *Environ Sci Technol* 39:3061–3068.
- 770 2. N’Guessan AL, Vrionis HA, Resch CT, Long PE, Lovley DR. 2008. Sustained removal of  
771 uranium from contaminated groundwater following stimulation of dissimilatory metal  
772 reduction. *Environ Sci Technol* 42:2999–3004.
- 773 3. Toner BM, Fakra SC, Manganini SJ, Santelli CM, Marcus MA, Moffett JW, Rouxel O,  
774 German CR, Edwards KJ. 2009. Preservation of iron(II) by carbon-rich matrices in a  
775 hydrothermal plume. *Nat Geosci* 2:197–201.
- 776 4. Williams KH, Long PE, Davis JA, Wilkins MJ, N’Guessan AL, Steefel CI, Yang L,  
777 Newcomer D, Spane FA, Kerkhof LJ, McGuinness L, Dayvault R, Lovley DR. 2011.  
778 Acetate availability and its influence on sustainable bioremediation of uranium-  
779 contaminated groundwater. *Geomicrobiol J* 28:519–539.
- 780 5. Yelton AP, Williams KH, Fournelle J, Wrighton KC, Handley KM, Banfield JF. 2013.  
781 Vanadate and acetate biostimulation of contaminated sediments decreases diversity,  
782 selects for specific taxa, and decreases aqueous V<sup>5+</sup> concentration. *Environ Sci Technol*  
783 47:6500–6509.
- 784 6. Couture R-M, Charlet L, Markelova E, Madé B, Parsons CT. 2015. On–off mobilization of  
785 contaminants in soils during redox oscillations. *Environ Sci Technol* 49:3015–3023.
- 786 7. Bond DR, Holmes DE, Tender LM, Lovley DR. 2002. Electrode-reducing microorganisms  
787 that harvest energy from marine sediments. *Science* 295:483–485.

- 788 8. Bond DR, Lovley DR. 2003. Electricity production by *Geobacter sulfurreducens* attached to  
789 electrodes. *Appl Environ Microbiol* 69:1548–1555.
- 790 9. Holmes DE, Bond DR, O’Neil RA, Reimers CE, Tender LR, Lovley DR. 2004. Microbial  
791 communities associated with electrodes harvesting electricity from a variety of aquatic  
792 sediments. *Microb Ecol* 48:178–190.
- 793 10. Ren Z, Steinberg LM, Regan JM. 2008. Electricity production and microbial biofilm  
794 characterization in cellulose-fed microbial fuel cells. *Water Sci Technol* 58:617–622.
- 795 11. Logan BE, Rabaey K. 2012. Conversion of wastes into bioelectricity and chemicals by  
796 using microbial electrochemical technologies. *Science* 337:686–690.
- 797 12. Schrader PS, Reimers CE, Girguis P, Delaney J, Doolan C, Wolf M, Green D. 2016.  
798 Independent benthic microbial fuel cells powering sensors and acoustic communications  
799 with the MARS underwater observatory. *J Atmospheric Ocean Technol* 33:607–617.
- 800 13. Schievano A, Pepé Sciarria T, Vanbroekhoven K, De Wever H, Puig S, Andersen SJ,  
801 Rabaey K, Pant D. 2016. Electro-fermentation – Merging electrochemistry with  
802 fermentation in industrial applications. *Trends Biotechnol* 34:866–878.
- 803 14. Gralnick JA, Newman DK. 2007. Extracellular respiration. *Mol Microbiol* 65:1–11.
- 804 15. Shi L, Dong H, Reguera G, Beyenal H, Lu A, Liu J, Yu H-Q, Fredrickson JK. 2016.  
805 Extracellular electron transfer mechanisms between microorganisms and minerals. *Nat*  
806 *Rev Microbiol* 14:651–662.
- 807 16. Navrotsky A, Mazeina L, Majzlan J. 2008. Size-driven structural and thermodynamic  
808 complexity in iron oxides. *Science* 319:1635–1638.

- 809 17. Majzlan J. 2013. Minerals and aqueous species of iron and manganese as reactants and  
810 products of microbial metal respiration, p. 1–28. *In* Gescher, J, Kappler, A (eds.), *Microbial*  
811 *Metal Respiration*. Springer Berlin Heidelberg.
- 812 18. Levar CE, Hoffman CL, Dunshee AJ, Toner BM, Bond DR. 2017. Redox potential as a  
813 master variable controlling pathways of metal reduction by *Geobacter sulfurreducens*.  
814 *ISME J* 11:741–752.
- 815 19. Marsili E, Sun J, Bond DR. 2010. Voltammetry and growth physiology of *Geobacter*  
816 *sulfurreducens* biofilms as a function of growth stage and imposed electrode potential.  
817 *Electroanalysis* 22:865–874.
- 818 20. Snider RM, Strycharz-Glaven SM, Tsoi SD, Erickson JS, Tender LM. 2012. Long-range  
819 electron transport in *Geobacter sulfurreducens* biofilms is redox gradient-driven. *Proc Natl*  
820 *Acad Sci* 109:15467–15472.
- 821 21. Robuschi L, Tomba JP, Schrott GD, Bonanni PS, Desimone PM, Busalmen JP. 2013.  
822 Spectroscopic slicing to reveal internal redox gradients in electricity-producing biofilms.  
823 *Angew Chem Int Ed* 52:925–928.
- 824 22. Zacharoff L, Chan CH, Bond DR. 2016. Reduction of low potential electron acceptors  
825 requires the CbcL inner membrane cytochrome of *Geobacter sulfurreducens*.  
826 *Bioelectrochemistry* 107:7–13.
- 827 23. Levar CE, Chan CH, Mehta-Kolte MG, Bond DR. 2014. An inner membrane cytochrome  
828 required only for reduction of high redox potential extracellular electron acceptors. *mBio*  
829 5:e02034-14.

- 830 24. Nevin KP, Kim B-C, Glaven RH, Johnson JP, Woodard TL, Methé BA, Jr RJD, Covalla SF,  
831 Franks AE, Liu A, Lovley DR. 2009. Anode biofilm transcriptomics reveals outer surface  
832 components essential for high density current production in *Geobacter sulfurreducens* fuel  
833 cells. PLOS ONE 4:e5628.
- 834 25. Leang C, Qian X, Mester T, Lovley DR. 2010. Alignment of the *c*-type cytochrome OmcS  
835 along pili of *Geobacter sulfurreducens*. Appl Environ Microbiol 76:4080–4084.
- 836 26. Tremblay P-L, Summers ZM, Glaven RH, Nevin KP, Zengler K, Barrett CL, Qiu Y, Palsson  
837 BO, Lovley DR. 2011. A *c*-type cytochrome and a transcriptional regulator responsible for  
838 enhanced extracellular electron transfer in *Geobacter sulfurreducens* revealed by adaptive  
839 evolution. Environ Microbiol 13:13–23.
- 840 27. Qian X, Mester T, Morgado L, Arakawa T, Sharma ML, Inoue K, Joseph C, Salgueiro CA,  
841 Maroney MJ, Lovley DR. 2011. Biochemical characterization of purified OmcS, a *c*-type  
842 cytochrome required for insoluble Fe(III) reduction in *Geobacter sulfurreducens*. Biochim  
843 Biophys Acta BBA - Bioenerg 1807:404–412.
- 844 28. Smith JA, Tremblay P-L, Shrestha PM, Snoeyenbos-West OL, Franks AE, Nevin KP,  
845 Lovley DR. 2014. Going wireless: Fe(III) oxide reduction without pili by *Geobacter*  
846 *sulfurreducens* strain JS-1. Appl Environ Microbiol 80:4331–4340.
- 847 29. Peng L, Zhang Y. 2017. Cytochrome OmcZ is essential for the current generation by  
848 *Geobacter sulfurreducens* under low electrode potential. Electrochimica Acta 228:447–  
849 452.
- 850 30. Zacharoff LA, Morrone D, Bond DR. 2017. *Geobacter sulfurreducens* extracellular  
851 multiheme cytochrome PgcA facilitates respiration to Fe(III) oxides but not electrodes.  
852 Front Microbiol 8:2481.



- 853 31. Reguera G, Nevin KP, Nicoll JS, Covalla SF, Woodard TL, Lovley DR. 2006. Biofilm and  
854 nanowire production leads to increased current in *Geobacter sulfurreducens* fuel cells.  
855 *Appl Environ Microbiol* 72:7345–7348.
- 856 32. Richardson DJ, Butt JN, Fredrickson JK, Zachara JM, Shi L, Edwards MJ, White G, Baiden  
857 N, Gates AJ, Marritt SJ, Clarke TA. 2012. The “porin–cytochrome” model for microbe-to-  
858 mineral electron transfer. *Mol Microbiol* 85:201–212.
- 859 33. Shi L, Fredrickson JK, Zachara JM. 2014. Genomic analyses of bacterial porin-cytochrome  
860 gene clusters. *Front Microbiol* 5:657.
- 861 34. Liu Y, Wang Z, Liu J, Levar C, Edwards MJ, Babauta JT, Kennedy DW, Shi Z, Beyenal H,  
862 Bond DR, Clarke TA, Butt JN, Richardson DJ, Rosso KM, Zachara JM, Fredrickson JK, Shi  
863 L. 2014. A trans-outer membrane porin-cytochrome protein complex for extracellular  
864 electron transfer by *Geobacter sulfurreducens* PCA. *Environ Microbiol Rep* 6:776–785.
- 865 35. Hartshorne RS, Reardon CL, Ross D, Nuester J, Clarke TA, Gates AJ, Mills PC,  
866 Fredrickson JK, Zachara JM, Shi L, Beliaev AS, Marshall MJ, Tien M, Brantley S, Butt JN,  
867 Richardson DJ. 2009. Characterization of an electron conduit between bacteria and the  
868 extracellular environment. *Proc Natl Acad Sci* 106:22169–22174.
- 869 36. Wang Z, Liu C, Wang X, Marshall MJ, Zachara JM, Rosso KM, Dupuis M, Fredrickson JK,  
870 Heald S, Shi L. 2008. Kinetics of reduction of Fe(III) complexes by outer membrane  
871 cytochromes MtrC and OmcA of *Shewanella oneidensis* MR-1. *Appl Environ Microbiol*  
872 74:6746–6755.
- 873 37. Coursolle D, Gralnick JA. 2012. Reconstruction of extracellular respiratory pathways for  
874 iron(III) reduction in *Shewanella oneidensis* strain MR-1. *Front Microbiol* 3.

- 875 38. White GF, Shi Z, Shi L, Wang Z, Dohnalkova AC, Marshall MJ, Fredrickson JK, Zachara  
876 JM, Butt JN, Richardson DJ, Clarke TA. 2013. Rapid electron exchange between surface-  
877 exposed bacterial cytochromes and Fe(III) minerals. *Proc Natl Acad Sci* 110:6346–6351.
- 878 39. Baron D, LaBelle E, Coursolle D, Gralnick JA, Bond DR. 2009. Electrochemical  
879 measurement of electron transfer kinetics by *Shewanella oneidensis* MR-1. *J Biol Chem*  
880 284:28865–28873.
- 881 40. Coursolle D, Baron DB, Bond DR, Gralnick JA. 2010. The Mtr respiratory pathway is  
882 essential for reducing flavins and electrodes in *Shewanella oneidensis*. *J Bacteriol*  
883 192:467–474.
- 884 41. Gralnick JA, Vali H, Lies DP, Newman DK. 2006. Extracellular respiration of dimethyl  
885 sulfoxide by *Shewanella oneidensis* strain MR-1. *Proc Natl Acad Sci U S A* 103:4669–  
886 4674.
- 887 42. Jiao Y, Newman DK. 2007. The *pio* operon is essential for phototrophic Fe(II) oxidation in  
888 *Rhodopseudomonas palustris* TIE-1. *J Bacteriol* 189:1765–1773.
- 889 43. Leang C, Coppi MV, Lovley DR. 2003. OmcB, a c-type polyheme cytochrome, involved in  
890 Fe(III) reduction in *Geobacter sulfurreducens*. *J Bacteriol* 185:2096–2103.
- 891 44. Leang C, Lovley DR. 2005. Regulation of two highly similar genes, *omcB* and *omcC*, in a  
892 10 kb chromosomal duplication in *Geobacter sulfurreducens*. *Microbiology* 151:1761–  
893 1767.
- 894 45. Liu Y, Fredrickson JK, Zachara JM, Shi L. 2015. Direct involvement of *ombB*, *omaB*, and  
895 *omcB* genes in extracellular reduction of Fe(III) by *Geobacter sulfurreducens* PCA. *Front*  
896 *Microbiol* 1075.

- 897 46. Chan CH, Levar CE, Jiménez Otero F, Bond DR. 2017. Genome scale mutational analysis  
898 of *Geobacter sulfurreducens* reveals distinct molecular mechanisms for respiration and  
899 sensing of poised electrodes vs. Fe(III) oxides. *J Bacteriol* 119:e00340-17.
- 900 47. Jiménez Otero F, Bond DR. 2017. Gene clusters encoding putative outer membrane  
901 electron conduits have specific roles during metal and electrode respiration in *Geobacter*  
902 *sulfurreducens*. bioRxiv 169086.
- 903 48. Yu NY, Wagner JR, Laird MR, Melli G, Rey S, Lo R, Dao P, Sahinalp SC, Ester M, Foster  
904 LJ, Brinkman FSL. 2010. PSORTb 3.0: improved protein subcellular localization prediction  
905 with refined localization subcategories and predictive capabilities for all prokaryotes.  
906 *Bioinformatics* 26:1608–1615.
- 907 49. Bagos PG, Liakopoulos TD, Spyropoulos IC, Hamodrakas SJ. 2004. PRED-TMBB: a web  
908 server for predicting the topology of  $\beta$ -barrel outer membrane proteins. *Nucleic Acids Res*  
909 32:W400–W404.
- 910 50. Juncker AS, Willenbrock H, von Heijne G, Brunak S, Nielsen H, Krogh A. 2003. Prediction  
911 of lipoprotein signal peptides in Gram-negative bacteria. *Protein Sci Publ Protein Soc*  
912 12:1652–1662.
- 913 51. Aklujkar M, Coppi MV, Leang C, Kim BC, Chavan MA, Perpetua LA, Giloteaux L, Liu A,  
914 Holmes DE. 2013. Proteins involved in electron transfer to Fe(III) and Mn(IV) oxides by  
915 *Geobacter sulfurreducens* and *Geobacter uraniireducens*. *Microbiology* 159:515–535.
- 916 52. Fujita M, Mihara H, Goto S, Esaki N, Kanehisa M. 2007. Mining prokaryotic genomes for  
917 unknown amino acids: a stop-codon-based approach. *BMC Bioinformatics* 8:225.

- 918 53. Coursolle D, Gralnick JA. 2010. Modularity of the Mtr respiratory pathway of *Shewanella*  
919 *oneidensis* strain MR-1. *Mol Microbiol* 77:995–1008.
- 920 54. Clarke TA, Edwards MJ, Gates AJ, Hall A, White GF, Bradley J, Reardon CL, Shi L,  
921 Beliaev AS, Marshall MJ, Wang Z, Watmough NJ, Fredrickson JK, Zachara JM, Butt JN,  
922 Richardson DJ. 2011. Structure of a bacterial cell surface decaheme electron conduit. *Proc*  
923 *Natl Acad Sci* 108:9384–9389.
- 924 55. Edwards MJ, Hall A, Shi L, Fredrickson JK, Zachara JM, Butt JN, Richardson DJ, Clarke  
925 TA. 2012. The crystal structure of the extracellular 11-heme cytochrome UndA reveals a  
926 conserved 10-heme motif and defined binding site for soluble iron chelates. *Structure*  
927 20:1275–1284.
- 928 56. Chan CH, Levar CE, Zacharoff L, Badalamenti JP, Bond DR. 2015. Scarless genome  
929 editing and stable inducible expression vectors for *Geobacter sulfurreducens*. *Appl Environ*  
930 *Microbiol* 81:7178–7186.
- 931 57. Holmes DE, Chaudhuri SK, Nevin KP, Mehta T, Methé BA, Liu A, Ward JE, Woodard TL,  
932 Webster J, Lovley DR. 2006. Microarray and genetic analysis of electron transfer to  
933 electrodes in *Geobacter sulfurreducens*. *Environ Microbiol* 8:1805–1815.
- 934 58. Bonanni PS, Bradley DF, Schrott GD, Busalmen JP. 2013. Limitations for current  
935 production in *Geobacter sulfurreducens* biofilms. *ChemSusChem* 6:711–720.
- 936 59. Juárez K, Kim B-C, Nevin K, Olvera L, Reguera G, Lovley DR, Methé BA. 2009. PilR, a  
937 transcriptional regulator for pilin and other genes required for Fe(III) reduction in *Geobacter*  
938 *sulfurreducens*. *J Mol Microbiol Biotechnol* 16:146–158.

- 939 60. Steidl RJ, Lampa-Pastirk S, Reguera G. 2016. Mechanistic stratification in electroactive  
940 biofilms of *Geobacter sulfurreducens* mediated by pilus nanowires. *Nat Commun* 7:12217.
- 941 61. Kim B-C, Leang C, Ding Y-HR, Glaven RH, Coppi MV, Lovley DR. 2005. OmcF, a putative  
942 c-type monoheme outer membrane cytochrome required for the expression of other outer  
943 membrane cytochromes in *Geobacter sulfurreducens*. *J Bacteriol* 187:4505–4513.
- 944 62. Methé BA, Nelson KE, Eisen JA, Paulsen IT, Nelson W, Heidelberg JF, Wu D, Wu M,  
945 Ward N, Beanan MJ, Dodson RJ, Madupu R, Brinkac LM, Daugherty SC, DeBoy RT,  
946 Durkin AS, Gwinn M, Kolonay JF, Sullivan SA, Haft DH, Selengut J, Davidsen TM, Zafar N,  
947 White O, Tran B, Romero C, Forberger HA, Weidman J, Khouri H, Feldblyum TV,  
948 Utterback TR, Aken SEV, Lovley DR, Fraser CM. 2003. Genome of *Geobacter*  
949 *sulfurreducens*: metal reduction in subsurface environments. *Science* 302:1967–1969.
- 950 63. Shelobolina ES, Coppi MV, Korenevsky AA, DiDonato LN, Sullivan SA, Konishi H, Xu H,  
951 Leang C, Butler JE, Kim B-C, Lovley DR. 2007. Importance of c-type cytochromes for  
952 U(VI) reduction by *Geobacter sulfurreducens*. *BMC Microbiol* 7:16.
- 953 64. Richter H, P. Nevin K, Jia H, A. Lowy D, R. Lovley D, M. Tender L. 2009. Cyclic  
954 voltammetry of biofilms of wild type and mutant *Geobacter sulfurreducens* on fuel cell  
955 anodes indicates possible roles of OmcB, OmcZ, type IV pili, and protons in extracellular  
956 electron transfer. *Energy Environ Sci* 2:506–516.
- 957 65. Stephen CS, LaBelle EV, Brantley SL, Bond DR. 2014. Abundance of the multiheme c-  
958 type cytochrome OmcB increases in outer biofilm layers of electrode-grown *Geobacter*  
959 *sulfurreducens*. *PLOS ONE* 9:e104336.
- 960 66. Ueki T, DiDonato LN, Lovley DR. 2017. Toward establishing minimum requirements for  
961 extracellular electron transfer in *Geobacter sulfurreducens*. *FEMS Microbiol Lett* 364.

- 962 67. Butler JE, Kaufmann F, Coppi MV, Núñez C, Lovley DR. 2004. MacA, a diheme *c*-type  
963 cytochrome involved in Fe(III) reduction by *Geobacter sulfurreducens*. *J Bacteriol*  
964 186:4042–4045.
- 965 68. Kim B-C, Lovley DR. 2008. Investigation of direct vs. indirect involvement of the *c*-type  
966 cytochrome MacA in Fe(III) reduction by *Geobacter sulfurreducens*. *FEMS Microbiol Lett*  
967 286:39–44.
- 968 69. Seidel J, Hoffmann M, Ellis KE, Seidel A, Spatzal T, Gerhardt S, Elliott SJ, Einsle O. 2012.  
969 MacA is a second cytochrome *c* peroxidase of *Geobacter sulfurreducens*. *Biochemistry*  
970 (Mosc) 51:2747–2756.
- 971 70. Gennaris A, Ezraty B, Henry C, Agrebi R, Vergnes A, Oheix E, Bos J, Leverrier P,  
972 Espinosa L, Szewczyk J, Vertommen D, Iranzo O, Collet J-F, Barras F. 2015. Repairing  
973 oxidized proteins in the bacterial envelope using respiratory chain electrons. *Nature*  
974 528:409–412.
- 975 71. Appel J, Phunpruch S, Steinmüller K, Schulz R. 2000. The bidirectional hydrogenase of  
976 *Synechocystis sp.* PCC 6803 works as an electron valve during photosynthesis. *Arch*  
977 *Microbiol* 173:333–338.
- 978 72. Coppi MV. 2005. The hydrogenases of *Geobacter sulfurreducens*: a comparative genomic  
979 perspective. *Microbiology* 151:1239–1254.
- 980 73. Qiu Y, Cho B-K, Park YS, Lovley D, Palsson BØ, Zengler K. 2010. Structural and  
981 operational complexity of the *Geobacter sulfurreducens* genome. *Genome Res* 20:1304–  
982 1311.

- 983 74. Aussignargues C, Giuliani M-C, Infossi P, Lojou E, Guiral M, Giudici-Orticoni M-T, Ilbert M.  
984 2012. Rhodanese functions as sulfur supplier for key enzymes in sulfur energy  
985 metabolism. *J Biol Chem* 287:19936–19948.
- 986 75. Prat L, Maillard J, Rohrbach-Brandt E, Holliger C. 2012. An unusual tandem-domain  
987 rhodanese harbouring two active sites identified in *Desulfitobacterium hafniense*. *FEBS J*  
988 279:2754–2767.
- 989 76. Ravot G, Casalot L, Ollivier B, Loison G, Magot M. 2005. *rdIA*, a new gene encoding a  
990 rhodanese-like protein in *Halanaerobium congolense* and other thiosulfate-reducing  
991 anaerobes. *Res Microbiol* 156:1031–1038.
- 992 77. Ramírez P, Toledo H, Guiliani N, Jerez CA. 2002. An exported rhodanese-like protein is  
993 induced during growth of *Acidithiobacillus ferrooxidans* in metal sulfides and different sulfur  
994 compounds. *Appl Environ Microbiol* 68:1837–1845.
- 995 78. Jahan MI, Tobe R, Mihara H. 2018. Characterization of a novel porin-like protein, ExtI,  
996 from *Geobacter sulfurreducens* and its implication in the reduction of Selenite and Tellurite.  
997 *Int J Mol Sci* 19:809.
- 998 79. Nelson CE, Rogowski A, Morland C, Wilhide JA, Gilbert HJ, Gardner JG. 2017. Systems  
999 analysis in *Cellvibrio japonicus* resolves predicted redundancy of  $\beta$ -glucosidases and  
1000 determines essential physiological functions. *Mol Microbiol* 104:294–305.
- 1001 80. Cutting RS, Coker VS, Fellowes JW, Lloyd JR, Vaughan DJ. 2009. Mineralogical and  
1002 morphological constraints on the reduction of Fe(III) minerals by *Geobacter*  
1003 *sulfurreducens*. *Geochim Cosmochim Acta* 73:4004–4022.

- 1004 81. Coker VS, Byrne JM, Telling ND, Van Der Laan G, Lloyd JR, Hitchcock AP, Wang J,  
1005 Patrick R a. D. 2012. Characterisation of the dissimilatory reduction of Fe(III)-  
1006 oxyhydroxide at the microbe – mineral interface: the application of STXM–XMCD.  
1007 *Geobiology* 10:347–354.
- 1008 82. Eusterhues K, Hädrich A, Neidhardt J, Küsel K, Keller TF, Jandt KD, Totsche KU. 2014.  
1009 Reduction of ferrihydrite with adsorbed and coprecipitated organic matter: microbial  
1010 reduction by *Geobacter bremensis* vs. abiotic reduction by Na-dithionite. *Biogeosciences*  
1011 11:4953–4966.
- 1012 83. Simon R, Priefer U, Pühler A. 1983. A broad host range mobilization system for in vivo  
1013 genetic engineering: Transposon mutagenesis in Gram negative bacteria. *Nat Biotechnol*  
1014 1:784–791.
- 1015 84. McClure R, Balasubramanian D, Sun Y, Bobrovskyy M, Sumbly P, Genco CA, Vanderpool  
1016 CK, Tjaden B. 2013. Computational analysis of bacterial RNA-Seq data. *Nucleic Acids Res*  
1017 41:e140–e140.
- 1018 85. Markowitz VM, Chen I-MA, Palaniappan K, Chu K, Szeto E, Grechkin Y, Ratner A, Jacob  
1019 B, Huang J, Williams P, Huntemann M, Anderson I, Mavromatis K, Ivanova NN, Kyrpides  
1020 NC. 2012. IMG: the integrated microbial genomes database and comparative analysis  
1021 system. *Nucleic Acids Res* 40:D115–D122.
- 1022 86. Sievers F, Wilm A, Dineen D, Gibson TJ, Karplus K, Li W, Lopez R, McWilliam H,  
1023 Remmert M, Söding J, Thompson JD, Higgins DG. 2011. Fast, scalable generation of high-  
1024 quality protein multiple sequence alignments using Clustal Omega. *Mol Syst Biol* 7:539.



1025 **Tables:**

1026

1027 **Table 1**

| Strains and Plasmids                    | Description or relevant genotype                                                              | Reference                  |
|-----------------------------------------|-----------------------------------------------------------------------------------------------|----------------------------|
| <i>Geobacter sulfurreducens</i> strains |                                                                                               |                            |
| DB1279                                  | $\Delta$ GSU2731-39 ( $\Delta$ <i>omcBC</i> )                                                 | Chan <i>et al.</i> , 2017  |
| DB1280                                  | $\Delta$ GSU2645-42 ( $\Delta$ <i>extABCD</i> )                                               | Chan <i>et al.</i> , 2017  |
| DB1281                                  | $\Delta$ GSU2940-36 ( $\Delta$ <i>extHIJKL</i> )                                              | Chan <i>et al.</i> , 2017  |
| DB1282                                  | $\Delta$ GSU2724-26 ( $\Delta$ <i>extEFG</i> )                                                | Chan <i>et al.</i> , 2017  |
| DB1487                                  | $\Delta$ GSU2731-39 $\Delta$ GSU2645-42 ( $\Delta$ <i>omcBC</i> $\Delta$ <i>extABCD</i> )     | This study                 |
| DB1488                                  | $\Delta$ GSU2731-39 $\Delta$ GSU2724-26 ( $\Delta$ <i>omcBC</i> $\Delta$ <i>extEFG</i> )      | This study                 |
| DB1289                                  | $\Delta$ GSU2731-39 $\Delta$ GSU2940-36 ( $\Delta$ <i>omcBC</i> $\Delta$ <i>extHIJKL</i> )    | This study                 |
| DB1489                                  | $\Delta$ GSU2645-42 $\Delta$ GSU2724-26 ( $\Delta$ <i>extABCD</i> $\Delta$ <i>extEFG</i> )    | This study                 |
| DB1490                                  | $\Delta$ GSU2645-42 $\Delta$ GSU2940-36 ( $\Delta$ <i>extABCD</i> $\Delta$ <i>extHIJKL</i> )  | This study                 |
| DB1290                                  | $\Delta$ GSU2731-39 $\Delta$ GSU2940-36 $\Delta$ GSU2724-26 ( <i>extABCD</i> <sup>+</sup> )   | This study                 |
| DB1291                                  | $\Delta$ GSU2731-39 $\Delta$ GSU2645-42 $\Delta$ GSU2936-2940 ( <i>extEFG</i> <sup>+</sup> )  | This study                 |
| DB1491                                  | $\Delta$ GSU2731-39 $\Delta$ GSU2645-42 $\Delta$ GSU2726-24 ( <i>extHIJKL</i> <sup>+</sup> )  | This study                 |
| DB1492                                  | $\Delta$ GSU2645-42 $\Delta$ GSU2726-24 $\Delta$ 2940-36 ( <i>omcBC</i> <sup>+</sup> )        | This study                 |
| DB1493                                  | $\Delta$ GSU2731-39 $\Delta$ GSU2645-42 $\Delta$ GSU2726-24 $\Delta$ GSU2940-36 ( $\Delta$ 5) | This study                 |
| <i>Escherichia coli</i>                 |                                                                                               |                            |
| S17-1                                   | <i>recA pro hsdR</i> RP4-2-Tc::Mu-Km::Tn7                                                     | Simon <i>et al.</i> , 1983 |
| Plasmids                                |                                                                                               |                            |
| pK18 <i>mobsacB</i>                     |                                                                                               | Simon <i>et al.</i> , 1983 |
| pRK2-Geo2                               |                                                                                               | Chan <i>et al.</i> , 2015  |
| p <i>DomcBC</i>                         | Flanking regions of <i>omcBC</i> in pK18 <i>mobsacB</i>                                       | This study                 |
| p <i>DextABCD</i>                       | Flanking regions of <i>extABCD</i> in pK18 <i>mobsacB</i>                                     | This study                 |
| p <i>DextEFG</i>                        | Flanking regions of <i>extEFG</i> in pK18 <i>mobsacB</i>                                      | This study                 |
| p <i>DextHIJKL</i>                      | Flanking regions of <i>extHIJKL</i> in pK18 <i>mobsacB</i>                                    | This study                 |
| p <i>omcB</i>                           | <i>ombB-omaB-omcB</i> in pRK2-Geo2                                                            | This study                 |
| p <i>extABCD</i>                        | <i>extABCD</i> in pRK2-Geo2                                                                   | This study                 |

1028

1029

1030 **Table 1. Strains and plasmids used in this study.**

1031

1032

1033 **Table 2**

1034

1035

| Substrate       | % of wild type |                  |                 |                   |             |             |            |              |            |
|-----------------|----------------|------------------|-----------------|-------------------|-------------|-------------|------------|--------------|------------|
|                 | $\Delta omcBC$ | $\Delta extABCD$ | $\Delta extEFG$ | $\Delta extHIJKL$ | $omcBC^+$   | $extABCD^+$ | $extEFG^+$ | $extHIJKL^+$ | $\Delta 5$ |
| Fe(III) citrate | 61.2 ± 10.5    | 105 ± 6.6        | 62.5 ± 4.9      | 66.3 ± 2.5        | 101.1 ± 8.4 | 99.2 ± 11.3 | 22.5 ± 2.4 | 23.8 ± 6.4   | 0.1 ± 0.6  |
| Fe(II)-oxide    | 68.9 ± 8.4     | 83.3 ± 12.1      | 87.5 ± 14.9     | 95.8 ± 24.9       | 78.8 ± 3.9  | 29.2 ± 2.6  | 60.4 ± 9.5 | 52.1 ± 3.7   | 0.1 ± 0.3  |
| Mn(IV)-oxide    | 94.5 ± 6.4     | 95.1 ± 2.8       | 99.6 ± 3.4      | 97.9 ± 6.1        | 83.3 ± 14.1 | 26.7 ± 5.9  | 86.8 ± 6.5 | 75.6 ± 7.3   | 1.7 ± 0.9  |
| Electrode       | 76.5 ± 16.5    | 20.9 ± 6.0       | 104.8 ± 2.1     | 86.3 ± 15.3       | 28.3 ± 5.2  | 137.9 ± 9.5 | 21.2 ± 6.5 | 25.9 ± 4.2   | 21.9 ± 4.4 |

1036

1037

1038 **Table 2. Comparative performance of *G. sulfurreducens* strains lacking one**

1039 **cluster, or containing only one cluster.** Growth of single cytochrome conduit deletion

1040 mutants and mutants lacking all clusters except one, averaged from eight biological

1041 replicates or more and represented as the percent of wild type growth. Averages and

1042 standard deviation represented.

1043

1044 **Figure Legends**

1045

1046 **Figure 1. The outer membrane electron conduit gene clusters of *G.***

1047 ***sulfurreducens*.** A) Genetic organization and predicted features of operons containing  
1048 putative outer membrane conduits. Deletion constructs indicated by dashed line. B)  
1049 Identity matrix from amino acid sequence alignment of each cytochrome or  $\beta$ -barrel  
1050 component using Clustal $\Omega$ .

1051

1052 **Figure 2. *OmcBC* or *ExtABCD* are sufficient during Fe(III)-citrate reduction,**

1053 **deletion of all clusters eliminates Fe(III)-citrate reduction.** Growth using 55 mM  
1054 Fe(III)-citrate as an electron acceptor by A) single conduit cluster deletion mutants, B)  
1055 triple mutants lacking all but one cytochrome conduit, as well as the  $\Delta 5$  strain lacking all  
1056 five cytochrome conduits, C) mutants in an  $\Delta omcBC$  background strain, and D)  $\Delta 5$   
1057 mutants expressing *omcB* or *extABCD* or carrying an empty expression vector as  
1058 control. All experiments were conducted in triplicate and curves are average  $\pm$  SD of  $n \geq$   
1059 3 replicates.

1060

1061 **Figure 3. No single outer membrane cluster is essential but all are necessary for**

1062 **wild type levels of electron transfer to Fe(III)- and Mn(IV)-oxides.** Growth of single  
1063 cluster deletion mutants and triple mutants lacking all but one cytochrome conduit  
1064 cluster, as well as the  $\Delta 5$  mutant lacking all clusters utilizing A-B) 70 mM Fe(III)-oxide or  
1065 C-D) 20 mM Mn(IV)-oxide as terminal electron acceptor. All experiments were  
1066 conducted in triplicate and curves are average  $\pm$  SD of  $n \geq 3$  replicates.

1067

1068 **Figure 4. OmcBC and ExtEFG have additive roles in Fe(III)- and Mn(IV)-oxide**  
1069 **reduction.** Reduction of A) 70 mM Fe(III)-oxide or B) 20 mM Mn(IV)-oxide by the  
1070  $\Delta omcBC$  strain and additional deletions in an  $\Delta omcBC$  background. All experiments  
1071 were conducted in triplicate and curves are average  $\pm$  SD of  $n \geq 3$  replicates.

1072

1073 **Figure 5. Partial complementation by single conduit clusters supports hypothesis**  
1074 **that multiple conduit complexes are necessary for wild-type levels of metal oxide**  
1075 **reduction.** Reduction of A) 70 mM Fe(III)-oxide or B) 20 mM Mn(IV)-oxide by the  $\Delta 5$   
1076 mutant expressing *extABCD* or the *omcB* cluster compared to the empty vector control.  
1077 All experiments were conducted in triplicate and curves are average  $\pm$  SD of  $n \geq 3$   
1078 replicates.

1079

1080 **Figure 6. Only the ExtABCD conduit cluster is necessary for electrode reduction.**  
1081 Current density produced by A) single and B) multiple-cluster deletion mutants on  
1082 graphite electrodes poised at +0.24 V vs. SHE. All mutants were grown in at least two  
1083 separate experiments, and curves are representative of  $n \geq 3$  independent replicates  
1084 per experiment. Similar results were obtained at lower (-0.1 V vs. SHE) redox potentials.

1085

1086 **Figure 7. Effect of kanamycin on final current density, and comparison of**  
1087 **ExtABCD and OmcBC complementation.** A) Final current density of wild type *G.*  
1088 *sulfurreducens* compared to wild type carrying an empty vector in the presence of  
1089 increasing kanamycin concentrations. B) Current density produced by the  $\Delta 5$  strain plus

1090 either *extABCD* or *omcB* cluster-containing vectors, in the presence of 5 µg/ml residual  
1091 kanamycin. Wild type and  $\Delta 5$  strains carrying the empty vector were used as controls.  
1092 All experiments were conducted in duplicate and curves are representative of  $n \geq 3$   
1093 replicates per experiment.

1094

1095 **Figure 8. Transcriptomic analysis comparing fumarate vs. electrode growth for**  
1096 ***extABCD*<sup>+</sup> and wild type strains.** A) Comparison of expression levels of wild type  
1097 exponentially growing cells under fumarate- and electrode-respiring conditions, showing  
1098 no significant up- or downregulation of *ext* clusters.(orange triangles) or most other  
1099 known electron transfer proteins (red circles). Dark and light gray dotted lines represent  
1100 thresholds of 4 and 2 Log<sub>2</sub>, respectively. B) RPKM and Log<sub>2</sub> change of ORFs with  
1101 largest expression changes as well as genes studied in this work (for additional data,  
1102 see Table S2). Comparison of the transcriptome of wild type and *extABCD*<sup>+</sup> cells  
1103 exponentially growing using C) fumarate or D) electrode poised at +240 mV as terminal  
1104 electron acceptor, showing no changes to electron transfer proteins due to deletion of  
1105 *omBC*, *extEFG*, and *extHIJKL* clusters. Averages shown of biological replicate samples.  
1106

1107 **Figure 9. Cytochrome conduit conservation across the Order**

1108 **Desulfuromonadales.** Representation of cytochrome conduit clusters from the  
1109 Desulfuromonadales with homologs to either A) OmcBC, B) ExtABCD, C) ExtEFG, or  
1110 D) ExtHIJKL. Red arrows = putative outer membrane products with a predicted lipid  
1111 attachment site, yellow arrows = predicted periplasmic components, green arrows =  
1112 predicted outer membrane anchor components. Complete clusters with all components

1113 sharing >40% identity to the corresponding *G. sulfurreducens* cytochrome conduit are  
1114 indicated in boxes to the left of each gene cluster. Clusters in which one or more  
1115 proteins are replaced by a new element with <40% identity are listed on the right side of  
1116 each gene cluster. Proteins with numbers indicate the % identity to the *G.*  
1117 *sulfurreducens* version.

1118 <sup>a</sup>OmcBC homologs in these gene clusters also encode Hox hydrogenase complexes.  
1119 <sup>b</sup>Gene clusters have contiguous *extBCD* loci but *extA* is not in vicinity, as *extA* was  
1120 found in separate parts of the genome for some of those organisms (see Supplemental  
1121 Table S2). <sup>c</sup>Gene cluster has additional lipoprotein decaheme c-type cytochrome  
1122 upstream of *extE*. <sup>d</sup>Lipid attachment sites corresponding to ExtJL could not be found but  
1123 there is an additional small lipoprotein encoded within the gene cluster. For ExtHIJKL  
1124 clusters, homologs depicted above *extH* are found in gene clusters containing only *extI*,  
1125 whereas homologs depicted below *extH* are found in gene clusters containing full  
1126 *extHIJKL* loci. Upstream and on the opposite strand to all gene clusters homologous to  
1127 *extHIJKL* there is a transcription regulator of the LysR family, except <sup>e</sup>, where there is no  
1128 transcriptional regulator in that region, and <sup>f</sup>, where there are transcriptional regulators  
1129 of the TetR family instead.

1130

Figure 1.

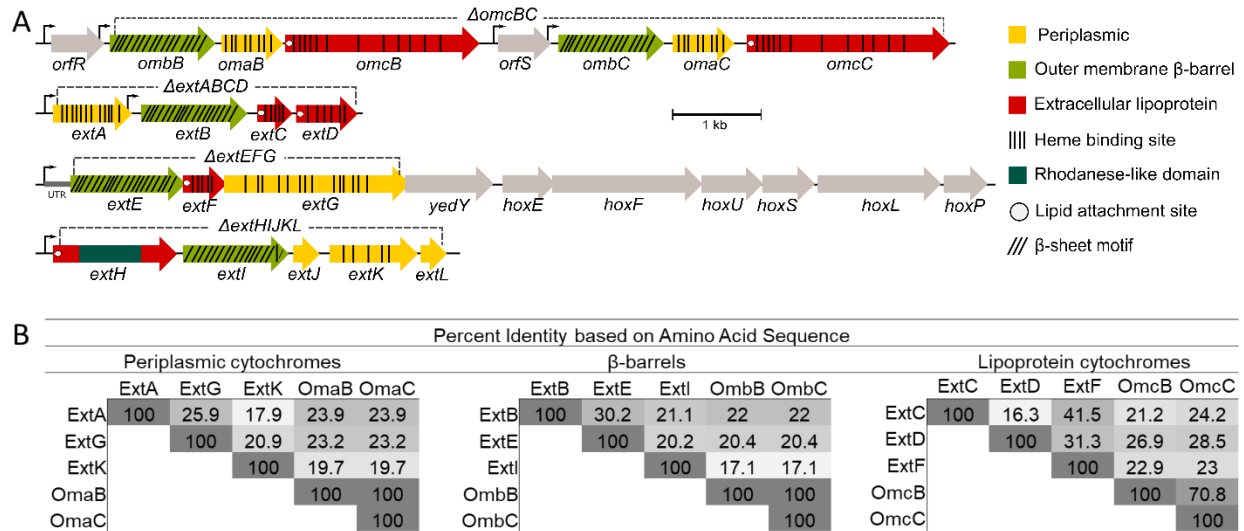

**Figure 1. The outer membrane electron conduit gene clusters of *G. sulfurreducens*.** A) Genetic organization and predicted features of operons containing putative outer membrane conduits. Deletion constructs indicated by dashed line. B) Identity matrix from amino acid sequence alignment of each cytochrome or β-barrel component using ClustalΩ.

Figure 2.

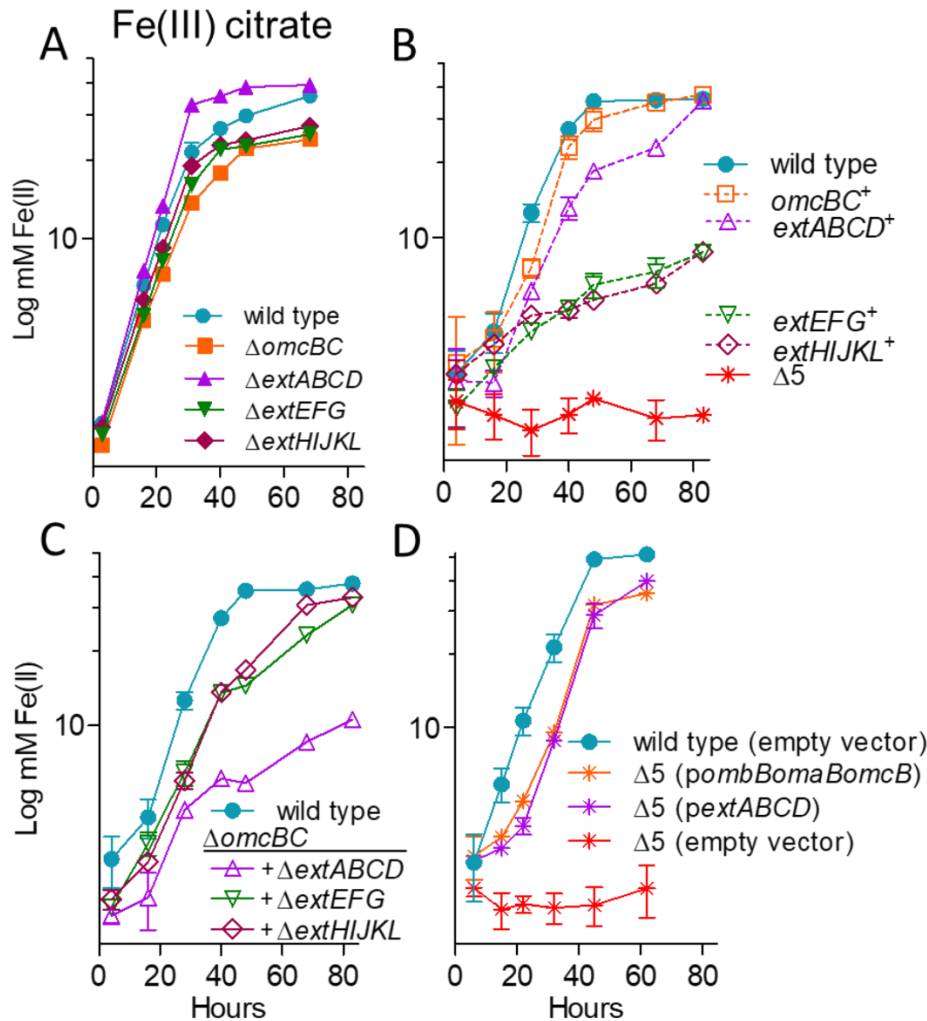

**Figure 2. OmcBC or ExtABCD are sufficient during Fe(III)-citrate reduction, deletion of all clusters eliminates Fe(III)-citrate reduction.** Growth using 55 mM Fe(III)-citrate as an electron acceptor by A) single conduit cluster deletion mutants, B) triple mutants lacking all but one cytochrome conduit, as well as the  $\Delta 5$  strain lacking all five cytochrome conduits, C) mutants in an  $\Delta omcBC$  background strain, and D)  $\Delta 5$  mutants expressing *omcB* or *extABCD* or carrying an empty expression vector as control. All experiments were conducted in triplicate and curves are average  $\pm$  SD of  $n \geq 3$  replicates.



Figure 3.

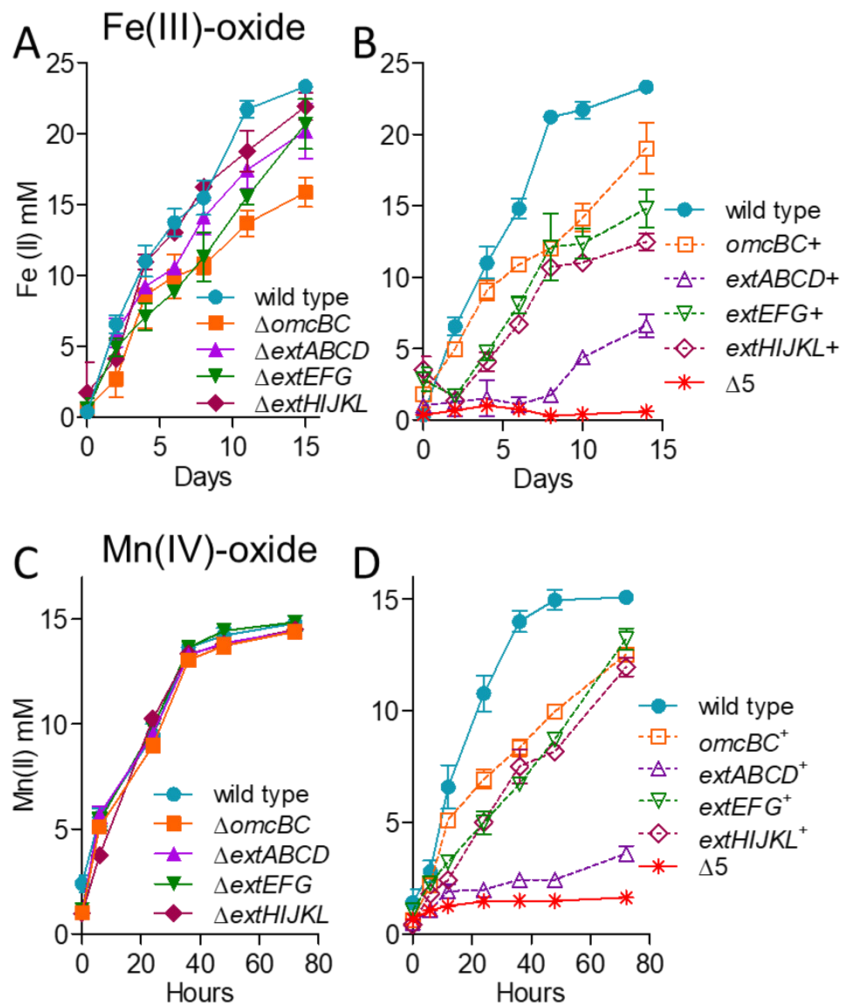

**Figure 3. No single outer membrane cluster is essential but all are necessary for wild type levels of electron transfer to Fe(III)- and Mn(IV)-oxides.** Growth of single cluster deletion mutants and triple mutants lacking all but one cytochrome conduit cluster, as well as the  $\Delta 5$  mutant lacking all clusters utilizing A) 70 mM Fe(III)-oxide or B) 20 mM Mn(IV)-oxide as terminal electron acceptor. All experiments were conducted in triplicate and curves are average  $\pm$  SD of  $n \geq 3$  replicates.

Figure 4.

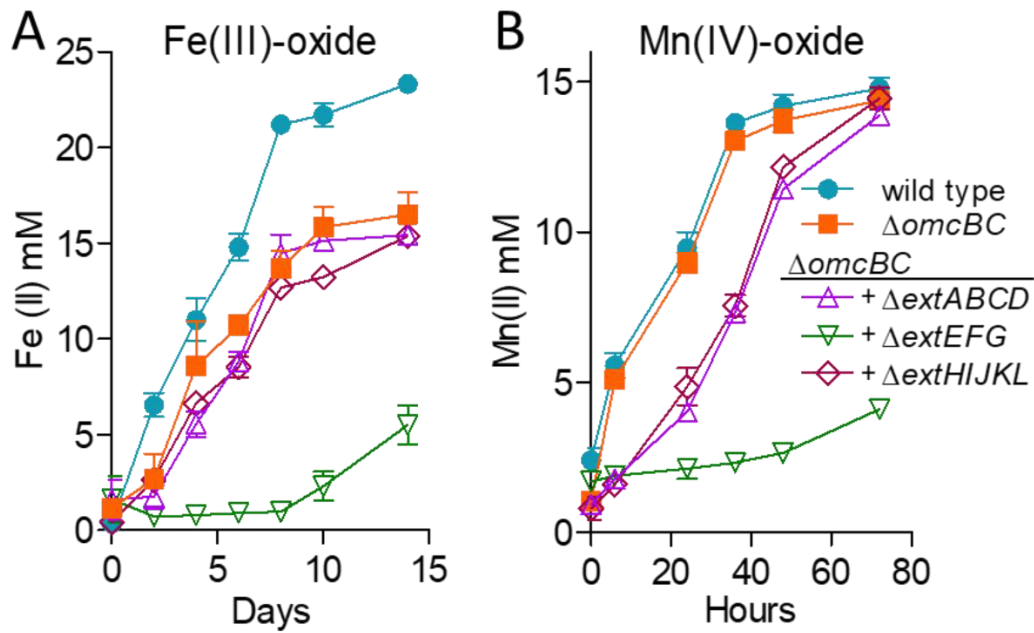

**Figure 4. OmcBC and ExtEFG have additive roles in Fe(III)- and Mn(IV)-oxide reduction.** Reduction of A) 70 mM Fe(III)-oxide or B) 20 mM Mn(IV)-oxide by the  $\Delta omcBC$  strain and additional deletions in an  $\Delta omcBC$  background. All experiments were conducted in triplicate and curves are average  $\pm$  SD of  $n \geq 3$  replicates.

Figure 5.

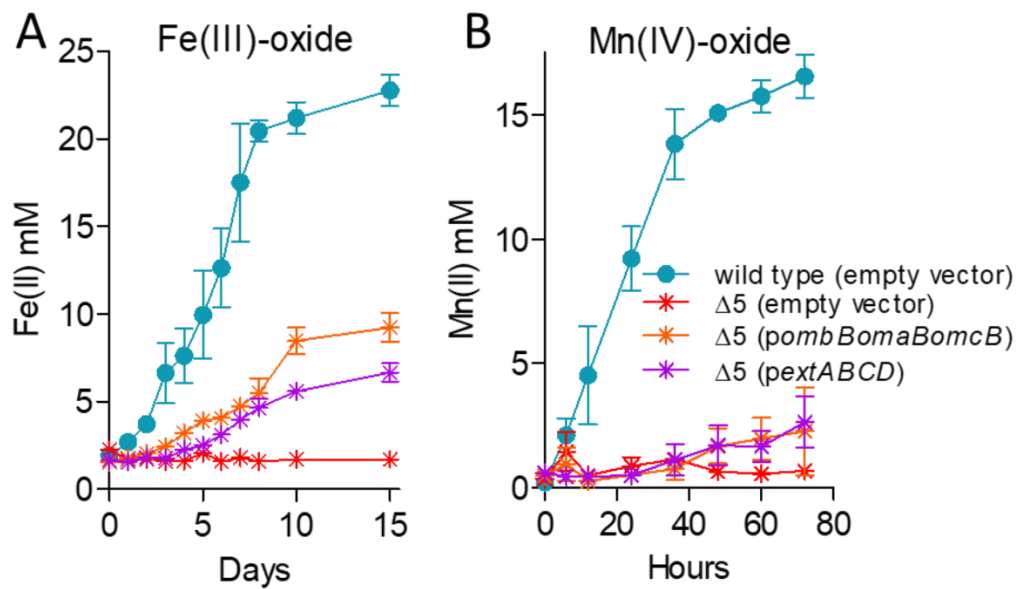

**Figure 5. Partial complementation by single conduit clusters supports hypothesis that multiple conduit complexes are necessary for wild-type levels of metal oxide reduction.** Reduction of A) 70 mM Fe(III)-oxide or B) 20 mM Mn(IV)-oxide by the  $\Delta 5$  mutant expressing *extABCD* or the *omcB* cluster compared to the empty vector control. All experiments were conducted in triplicate and curves are average  $\pm$  SD of  $n \geq 3$  replicates.

Figure 6

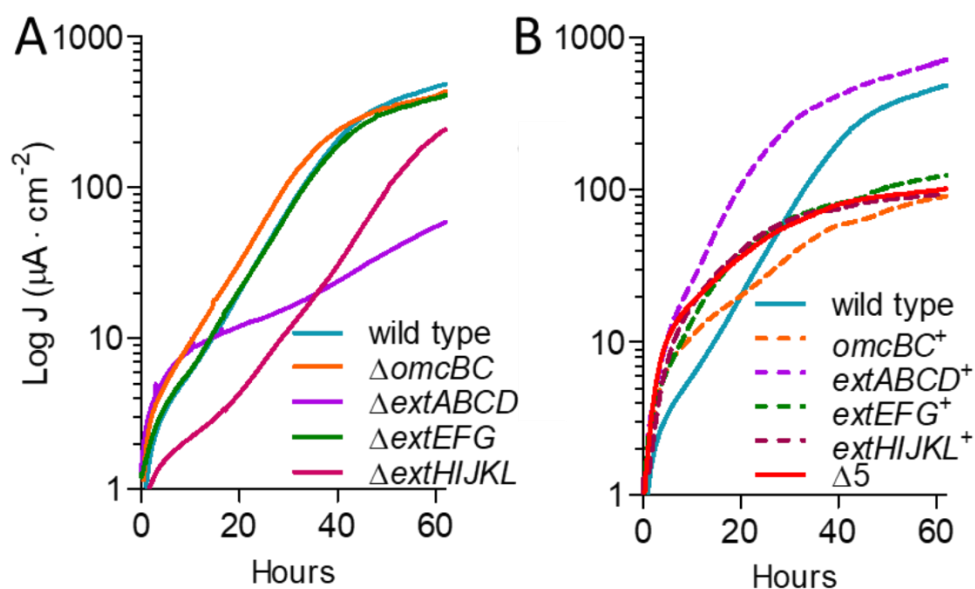

**Figure 6. Only the ExtABCD conduit cluster is necessary for electrode reduction.** Current density produced by A) single and B) multiple-cluster deletion mutants on graphite electrodes poised at +0.24 V vs. SHE. All mutants were grown in at least two separate experiments, and curves are representative of  $n \geq 3$  independent replicates per experiment. Similar results were obtained at lower (-0.1 V vs. SHE) redox potentials.

Figure 7.

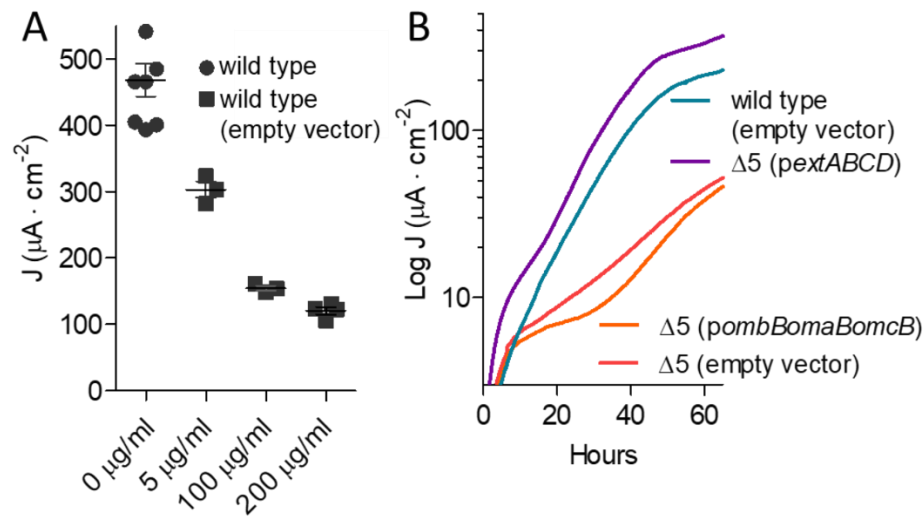

**Figure 7. Effect of kanamycin on final current density, and comparison of ExtABCD and OmcBC complementation.** A) Final current density of wild type *G. sulfurreducens* compared to wild type carrying an empty vector in the presence of increasing kanamycin concentrations. B) Current density produced by the Δ5 strain plus either *extABCD* or *omcB* cluster-containing vectors, in the presence of 5 μg/ml residual kanamycin. Wild type and Δ5 strains carrying the empty vector were used as controls. All experiments were conducted in duplicate and curves are representative of  $n \geq 3$  replicates per experiment.

Figure 8.

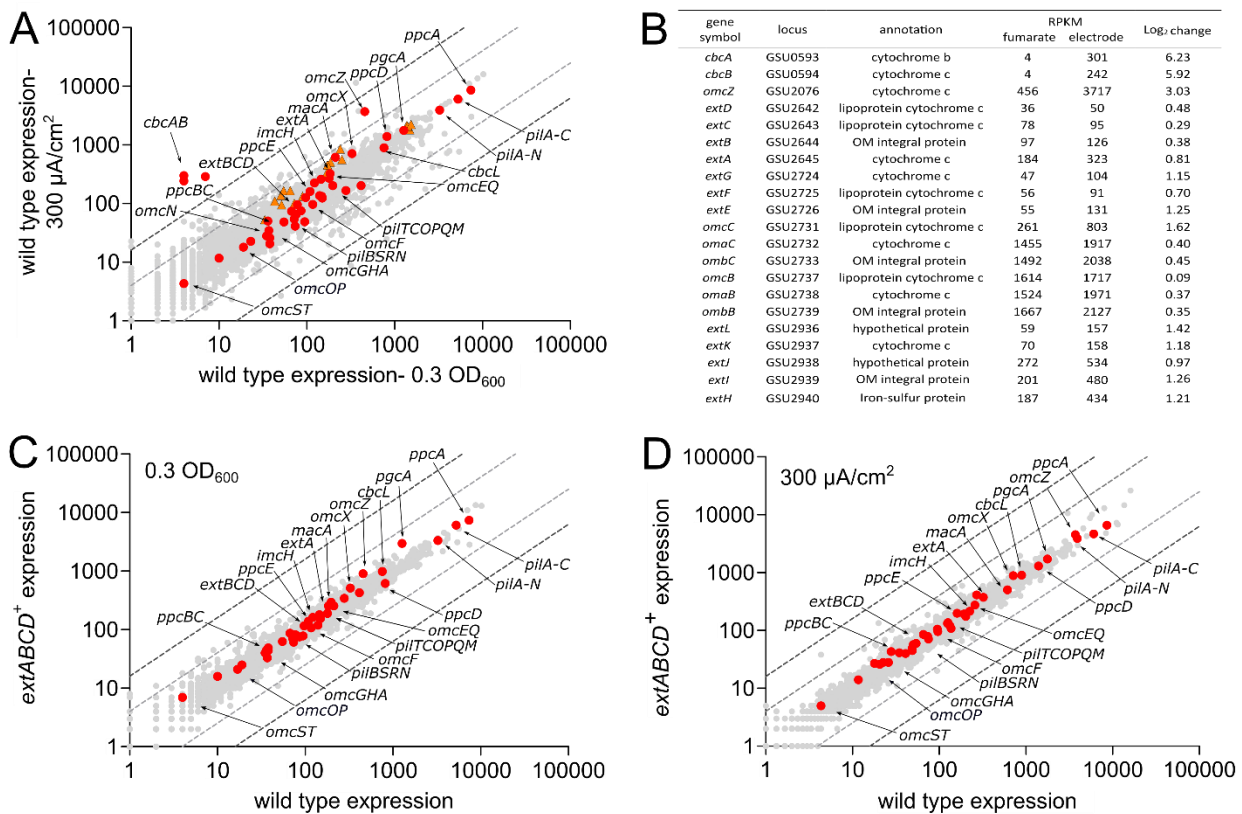

**Figure 8. Transcriptomic analysis shows no significant differences in expression between *extABCD*<sup>+</sup> and wild type strains.** . A) Comparison of expression levels of wild type exponentially growing cells under fumarate- and electrode-respiring conditions, showing no significant up- or downregulation of *ext* clusters (orange triangles) or most other known electron transfer proteins (red circles). Dark and light gray dotted lines represent thresholds of 4 and 2 Log<sub>2</sub>, respectively. B) RPKM and Log<sub>2</sub> change of ORFs with largest expression changes as well as genes studied in this work (for additional data, see Table S2). Comparison of the transcriptome of wild type and *extABCD*<sup>+</sup> cells exponentially growing using C) fumarate or D) electrode poised at +240 mV as terminal electron acceptor, showing no changes to electron transfer proteins due to deletion of *omBC*, *extEFG*, and *extHIJKL* clusters. Averages shown of biological replicate samples.

Figure 9.

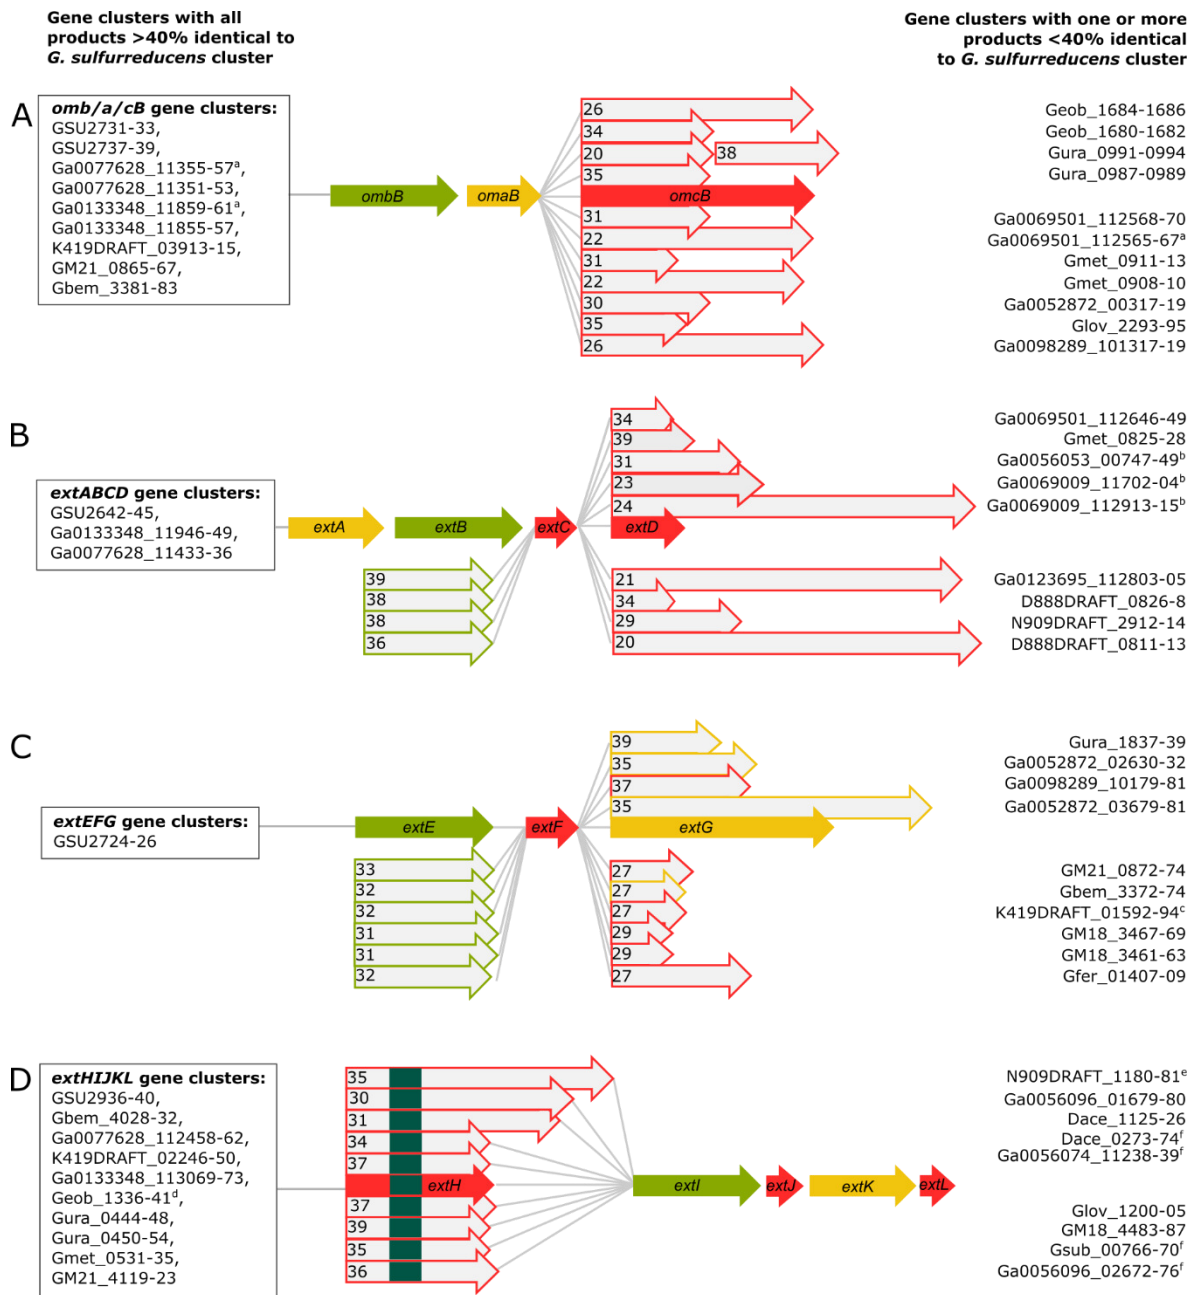

**Figure 9. Cytochrome conduit conservation across the Order Desulfuromonadales.**

Representation of cytochrome conduit clusters from the Desulfuromonadales with homologs to either A) OmcBC, B) ExtABCD, C) ExtEFG, or D) ExtHIJKL. Red arrows = putative outer membrane products with a predicted lipid attachment site, yellow arrows = predicted periplasmic components, green arrows = predicted outer membrane anchor components. Complete clusters with all components sharing >40% identity to the corresponding *G. sulfurreducens* cytochrome conduit are indicated in boxes to the left of each gene cluster. Clusters in which one or more proteins are replaced by a new element with <40% identity are listed on the right

side of each gene cluster. Proteins with numbers indicate the % identity to the *G. sulfurreducens* version.

<sup>a</sup>OmcBC homologs in these gene clusters also encode Hox hydrogenase complexes. <sup>b</sup>Gene clusters have contiguous *extBCD* loci but *extA* is not in vicinity, as *extA* was found in separate parts of the genome for some of those organisms (see Supplemental Table S2). <sup>c</sup>Gene cluster has additional lipoprotein decaheme *c*-cytochrome upstream of *extE*. <sup>d</sup>Lipid attachment sites corresponding to ExtJL could not be found but there is an additional small lipoprotein encoded within the gene cluster. For ExtHIJKL clusters, homologs depicted above *extH* are found in gene clusters containing only *extI*, whereas homologs depicted below *extH* are found in gene clusters containing full *extHIJKL* loci. Upstream and on the opposite strand to all gene clusters homologous to *extHIJKL* there is a transcription regulator of the LysR family, except <sup>e</sup>, where there is no transcriptional regulator in that region, and <sup>f</sup>, where there are transcriptional regulators of the TetR family instead.
